# Supplementary material for: Height-diameter allometry of tropical forest trees
Source: Copernicus journal article supplement (doi:10.5194/bg-8-1081-2011), 2011-05-05
Supplement: Supplementary file [file bg-8-1081-2011-supplement.pdf]

## Height-diameter allometry of tropical forest trees

Feldpausch *et al.*

Table S1: Plot characteristics for sites in Africa, Asia, Australia and S. America.

Figure S1: Mean precipitation (mm) and dry season (months <100 mm) by regional clusters for the study sites in Africa, Asia, Australia and South America.

Table S2: Allometric model form and coding fit by ordinary least squares and multi-level models relating tree height ( $H$ ) to bole diameter at 1.3 m height ( $D$ ) and environment.

Table S3: Statistical tests using multilevel mixed-effects and ordinary least squares models to examine the  $\log(H):\log(D)$  relationship and percent of the variance partitioned by hierarchical structure (random slope random intercept: plot random) for tree height ( $H$ , m) and diameter ( $D$ , dm), Pan-tropical (P), Continent (C) or Region (R), environment\*, and tree basal area ( $A$ , m<sup>2</sup>/ha) for wet to dry pan-tropical forests.

Table S4: Validation of pan-tropical, continent, regional, site-specific models. Tree height was estimated from each of the models and the median percent deviation  $((H_{\text{predicted}} - H_{\text{measured}}) / H_{\text{measured}}) * 100$  reported from the tree height measured in the field for wet to dry pan-tropical forests (Fm), where positive values indicate the model overestimated measured height.

Figure S2: Validation of height estimates according to multi-levels and the published Brown et al. 1989 moist forest equation for log-log a) model P, b) model RES, c) model S, d) model BrownMoist.

Figure S3a-f: Residuals from the multilevel log-log model RES versus environment and forest structure for a) basal area ( $A$ , m<sup>2</sup> ha<sup>-1</sup>), b) mean annual precipitation ( $P_A$ , mm), c) dry season ( $S_D$ , months < 100 mm), d) precipitation coefficient of variance ( $P_V$ ), e) mean annual temperature ( $T_A$ , °C) and f) tree diameter ( $D$ , dm).

Table S1: Plot characteristics for sites in Africa, Asia, Australia and S. America: forest status (secondary (S), selectively logged (L), burned (B), old-growth (OG)), coordinates, mean annual precipitation ( $P_A$ , mm) precipitation coefficient of variance ( $P_V$ ), dry season length ( $S_D$ , no. months <100 mm) and altitude ( $A_L$ , m a.s.l.). Sampling approach: stems sampled ( $n$ ); sampling method (1) all stems within plot, (2) all stems in selected subplots, (3) haphazard destructively sampled trees, (4) haphazard climbed trees, (5) stems from a stratified-random selection, (6) other random selection; measurement method (1) direct (destructively sampled), (2) direct (climbed), (3) by trigonometry (clinometer/hypsometer), (4) laser range-finder, (5) measuring pole.

| Country       | Plot code  | Forest Status | Latitude | Longitude | $P_A$ (mm) | $P_V$ | $S_D$ (months) | $A_L$ (m a.s.l.) | Stems sampled ( $n$ ) | Sampling method | Measurement method                 | Reference                          |
|---------------|------------|---------------|----------|-----------|------------|-------|----------------|------------------|-----------------------|-----------------|------------------------------------|------------------------------------|
| <b>Africa</b> |            |               |          |           |            |       |                |                  |                       |                 |                                    |                                    |
| Cameroon      | DJK-01     | OG            | 3.33     | 12.72     | 1624       | 0.57  | 4              | 666              | 59                    | 5               | 3                                  | Peh 2009; Lewis et al. 2009        |
|               | DJK-02     | OG            | 3.33     | 12.72     | 1624       | 0.57  | 4              | 666              | 59                    | 5               | 3                                  | Peh 2009; Lewis et al. 2009        |
|               | DJK-03     | OG            | 3.36     | 12.72     | 1623       | 0.58  | 4              | 657              | 66                    | 5               | 3                                  | Peh 2009; Lewis et al. 2009        |
|               | DJK-04     | OG            | 3.36     | 12.73     | 1623       | 0.58  | 4              | 657              | 65                    | 5               | 3                                  | Peh 2009; Lewis et al. 2009        |
|               | DJK-05     | OG            | 3.32     | 12.76     | 1625       | 0.57  | 4              | 673              | 64                    | 5               | 3                                  | Peh 2009; Lewis et al. 2009        |
|               | DJK-06     | OG            | 3.33     | 12.76     | 1625       | 0.57  | 4              | 673              | 61                    | 5               | 3                                  | Peh 2009; Lewis et al. 2009        |
|               | MbamDje-02 | OG            | 6.00     | 12.87     | 1593       | 0.74  | 5              | 779              | 12                    | 1               | 3 & 4                              | Mitchard et al. 2009               |
|               | MbamDje-03 | OG            | 5.99     | 12.87     | 1593       | 0.74  | 5              | 779              | 18                    | 1               | 3 & 4                              | Mitchard et al. 2009               |
|               | MbamDje-06 | OG            | 5.99     | 12.87     | 1593       | 0.74  | 5              | 779              | 6                     | 1               | 3 & 4                              | Mitchard et al. 2009               |
|               | MbamDje-07 | OG            | 5.98     | 12.87     | 1593       | 0.74  | 5              | 779              | 84                    | 1               | 3 & 4                              | Mitchard et al. 2009               |
|               | MbamDje-09 | OG            | 6.00     | 12.89     | 1593       | 0.74  | 5              | 770              | 42                    | 1               | 3 & 4                              | Mitchard et al. 2009               |
|               | MbamDje-11 | OG            | 6.01     | 12.89     | 1593       | 0.74  | 5              | 770              | 31                    | 1               | 3 & 4                              | Mitchard et al. 2009               |
|               | MbamDje-14 | OG            | 6.21     | 12.75     | 1636       | 0.75  | 5              | 858              | 38                    | 1               | 3 & 4                              | Mitchard et al. 2009               |
|               | MbamDje-16 | OG            | 6.22     | 12.75     | 1636       | 0.75  | 5              | 858              | 30                    | 1               | 3 & 4                              | Mitchard et al. 2009               |
|               | MDJ-01     | OG            | 6.17     | 12.83     | 1623       | 0.75  | 5              | 829              | 45                    | 5               | 3 & 4                              | T. Feldpausch et al. (unpublished) |
|               | MDJ-03     | OG            | 5.98     | 12.87     | 1593       | 0.74  | 5              | 779              | 45                    | 5               | 3 & 4                              | T. Feldpausch et al. (unpublished) |
| MDJ-05        | S          | 5.98          | 12.87    | 1593      | 0.74       | 5     | 779            | 40               | 5                     | 3 & 4           | T. Feldpausch et al. (unpublished) |                                    |
| MDJ-07        | OG         | 6.01          | 12.89    | 1593      | 0.74       | 5     | 770            | 43               | 5                     | 3 & 4           | T. Feldpausch et al. (unpublished) |                                    |
| MDJ-10        | S          | 6.00          | 12.89    | 1591      | 0.74       | 5     | 778            | 46               | 5                     | 3 & 4           | T. Feldpausch et al. (unpublished) |                                    |
| Gabon         | DOU-01     | OG            | -2.60    | 10.58     | 1786       | 0.73  | 4              | 236              | 390                   | 1               | 3                                  | Reitsma 1988; Lewis et al. 2009    |
|               | EKO-01     | OG            | 0.38     | 13.10     | 1660       | 0.59  | 4              | 529              | 430                   | 1               | 3                                  | Reitsma 1988; Lewis et al. 2009    |
|               | LOP-01     | OG            | -0.17    | 11.42     | 1753       | 0.69  | 4              | 292              | 385                   | 1               | 3                                  | Reitsma 1988; Lewis et al. 2009    |
|               | LWW-01     | OG            | -0.42    | 11.40     | 1831       | 0.7   | 4              | 339              | 14                    | 4               | 2                                  | Lewis et al. 2009                  |

|             |           |    |      |       |      |      |   |     |     |   |       |                                    |
|-------------|-----------|----|------|-------|------|------|---|-----|-----|---|-------|------------------------------------|
|             | MAK-01    | OG | 0.67 | 12.83 | 1643 | 0.61 | 4 | 531 | 10  | 4 | 2     | Lewis et al. 2009                  |
|             | OVG-01    | OG | 0.73 | 11.37 | 1758 | 0.65 | 4 | 597 | 473 | 1 | 3     | Reitsma 1988; Lewis et al. 2009    |
| Ghana       | ASN-02    | OG | 6.56 | -2.22 | 1409 | 0.53 | 5 | 225 | 12  | 4 | 2     | Lewis et al. 2009                  |
|             | ASN-04    | OG | 6.48 | -2.17 | 1433 | 0.52 | 5 | 218 | 16  | 4 | 2     | Lewis et al. 2009                  |
|             | ASU-01    | OG | 7.14 | -2.45 | 1212 | 0.58 | 5 | 270 | 49  | 5 | 3 & 4 | T. Feldpausch et al. (unpublished) |
|             | BFI-03    | OG | 7.70 | -1.70 | 1279 | 0.62 | 5 | 327 | 43  | 5 | 3 & 4 | T. Feldpausch et al. (unpublished) |
|             | BFI-04    | OG | 7.71 | -1.70 | 1279 | 0.62 | 5 | 327 | 35  | 5 | 3 & 4 | T. Feldpausch et al. (unpublished) |
|             | CAP-09    | OG | 4.85 | -2.10 | 1740 | 0.66 | 4 | 35  | 16  | 4 | 2     | Lewis et al. 2009                  |
|             | CAP-10    | OG | 4.80 | -2.05 | 1700 | 0.7  | 5 | 72  | 19  | 4 | 2     | Lewis et al. 2009                  |
| Ivory Coast | MNIC65-01 | OG | 5.33 | -4.17 | 1753 | 0.93 | 6 | 11  | 35  | 6 | 3     | Müller and Nielsen 1965            |
|             | MNIC65-02 | OG | 5.33 | -4.17 | 1753 | 0.93 | 6 | 11  | 63  | 6 | 3     | Müller and Nielsen 1965            |
| Liberia     | CVL-01    | OG | 6.19 | -8.18 | 1959 | 0.57 | 3 | 260 | 482 | 1 | 3     | H. Wöll (see Poorter et al. 2003)  |
|             | CVL-08    | OG | 6.19 | -8.18 | 1959 | 0.57 | 3 | 260 | 545 | 1 | 3     | H. Wöll (see Poorter et al. 2003)  |
|             | CVL-10    | OG | 6.19 | -8.18 | 1959 | 0.57 | 3 | 260 | 522 | 1 | 3     | H. Wöll (see Poorter et al. 2003)  |
|             | CVL-11    | OG | 6.19 | -8.18 | 1959 | 0.57 | 3 | 260 | 494 | 1 | 3     | H. Wöll (see Poorter et al. 2003)  |
|             | GBO-01    | OG | 5.39 | -7.62 | 2333 | 0.4  | 1 | 159 | 335 | 1 | 3     | H. Wöll (see Poorter et al. 2003)  |
|             | GBO-02    | OG | 5.40 | -7.62 | 2333 | 0.4  | 1 | 159 | 391 | 1 | 3     | H. Wöll (see Poorter et al. 2003)  |
|             | GBO-03    | OG | 5.39 | -7.62 | 2333 | 0.4  | 1 | 159 | 439 | 1 | 3     | H. Wöll (see Poorter et al. 2003)  |
|             | GBO-04    | OG | 5.40 | -7.61 | 2333 | 0.4  | 1 | 159 | 338 | 1 | 3     | H. Wöll (see Poorter et al. 2003)  |
|             | GBO-08    | OG | 5.39 | -7.62 | 2333 | 0.4  | 1 | 159 | 340 | 1 | 3     | H. Wöll (see Poorter et al. 2003)  |
|             | GBO-10    | OG | 5.40 | -7.59 | 2333 | 0.4  | 1 | 159 | 292 | 1 | 3     | H. Wöll (see Poorter et al. 2003)  |
|             | GBO-11    | OG | 5.39 | -7.59 | 2333 | 0.4  | 1 | 159 | 398 | 1 | 3     | H. Wöll (see Poorter et al. 2003)  |
|             | GBO-13    | OG | 5.41 | -7.63 | 2384 | 0.4  | 1 | 164 | 255 | 1 | 3     | H. Wöll (see Poorter et al. 2003)  |
|             | GBO-14    | OG | 5.41 | -7.62 | 2333 | 0.4  | 1 | 159 | 407 | 1 | 3     | H. Wöll (see Poorter et al. 2003)  |
|             | GBO-15    | OG | 5.41 | -7.61 | 2333 | 0.4  | 1 | 159 | 368 | 1 | 3     | H. Wöll (see Poorter et al. 2003)  |
|             | GBO-16    | OG | 5.40 | -7.61 | 2333 | 0.4  | 1 | 159 | 453 | 1 | 3     | H. Wöll (see Poorter et al. 2003)  |
|             | GBO-18    | OG | 5.41 | -7.60 | 2333 | 0.4  | 1 | 159 | 326 | 1 | 3     | H. Wöll (see Poorter et al. 2003)  |
|             | GBO-19    | OG | 5.41 | -7.60 | 2333 | 0.4  | 1 | 159 | 357 | 1 | 3     | H. Wöll (see Poorter et al. 2003)  |

|             |           |    |       |        |      |      |   |      |     |   |       |                                   |
|-------------|-----------|----|-------|--------|------|------|---|------|-----|---|-------|-----------------------------------|
|             | GBO-20    | OG | 5.41  | -7.59  | 2333 | 0.4  | 1 | 159  | 333 | 1 | 3     | H. Wöll (see Poorter et al. 2003) |
| Tanzania    | VTA-01    | OG | -7.82 | 36.98  | 1505 | 0.88 | 6 | 281  | 64  | 5 | 3     | A. Marshall et al. (unpublished)  |
|             | VTA-02    | OG | -7.81 | 36.87  | 1454 | 0.88 | 7 | 1072 | 75  | 5 | 3     | A. Marshall et al. (unpublished)  |
|             | VTA-03    | OG | -7.77 | 36.89  | 1486 | 0.88 | 6 | 771  | 62  | 5 | 3     | A. Marshall et al. (unpublished)  |
|             | VTA-04    | OG | -7.74 | 36.91  | 1402 | 0.88 | 7 | 1127 | 50  | 5 | 3     | A. Marshall et al. (unpublished)  |
|             | VTA-05    | OG | -7.81 | 36.85  | 1454 | 0.88 | 7 | 1072 | 49  | 5 | 3     | A. Marshall et al. (unpublished)  |
|             | VTA-06    | OG | -7.81 | 36.82  | 1423 | 0.88 | 7 | 1211 | 53  | 5 | 3     | A. Marshall et al. (unpublished)  |
|             | VTA-07    | OG | -7.76 | 36.87  | 1377 | 0.88 | 7 | 1393 | 48  | 5 | 3     | A. Marshall et al. (unpublished)  |
|             | VTA-08    | OG | -7.76 | 36.87  | 1377 | 0.88 | 7 | 1393 | 49  | 5 | 3     | A. Marshall et al. (unpublished)  |
|             | VTA-09    | OG | -7.71 | 36.89  | 1402 | 0.88 | 7 | 1127 | 49  | 5 | 3     | A. Marshall et al. (unpublished)  |
|             | VTA-10    | OG | -7.69 | 36.87  | 1341 | 0.88 | 7 | 1305 | 54  | 5 | 3     | A. Marshall et al. (unpublished)  |
|             | VTA-11    | OG | -7.69 | 36.88  | 1335 | 0.87 | 7 | 1517 | 61  | 5 | 3     | A. Marshall et al. (unpublished)  |
|             | VTA-12    | OG | -5.09 | 38.62  | 1868 | 0.61 | 3 | 1021 | 59  | 5 | 3     | A. Marshall et al. (unpublished)  |
|             | VTA-13    | OG | -5.11 | 38.62  | 1868 | 0.61 | 3 | 1021 | 48  | 5 | 3     | A. Marshall et al. (unpublished)  |
|             | VTA-14    | OG | -5.1  | 38.65  | 1621 | 0.56 | 6 | 790  | 47  | 5 | 3     | A. Marshall et al. (unpublished)  |
|             | VTA-15    | OG | -4.82 | 38.51  | 1378 | 0.6  | 8 | 1427 | 40  | 5 | 3     | A. Marshall et al. (unpublished)  |
|             | VTA-16    | OG | -4.84 | 38.5   | 1333 | 0.6  | 8 | 1397 | 36  | 5 | 3     | A. Marshall et al. (unpublished)  |
|             | VTA-17    | OG | -4.82 | 38.5   | 1119 | 0.56 | 7 | 1779 | 48  | 5 | 3     | A. Marshall et al. (unpublished)  |
|             | VTA-18    | OG | -5.07 | 38.41  | 1664 | 0.7  | 6 | 1129 | 51  | 5 | 3     | A. Marshall et al. (unpublished)  |
|             | VTA-19    | OG | -7.85 | 36.87  | 1515 | 0.89 | 6 | 872  | 94  | 5 | 3     | A. Marshall et al. (unpublished)  |
|             | VTA-20    | OG | -7.83 | 36.83  | 1454 | 0.88 | 7 | 1072 | 115 | 5 | 3     | A. Marshall et al. (unpublished)  |
| Uganda      | UgaETAM-1 | OG | 1.71  | 31.51  | 1330 | 0.42 | 4 | 1066 | 261 | 5 | 3 & 4 | E. Mitchard (unpublished)         |
|             | UgaETAM-2 | OG | 1.71  | 31.51  | 1330 | 0.42 | 4 | 1066 | 195 | 5 | 3 & 4 | E. Mitchard (unpublished)         |
|             | UgaETAM-7 | OG | 1.71  | 31.51  | 1330 | 0.42 | 4 | 1066 | 50  | 5 | 3 & 4 | E. Mitchard (unpublished)         |
| <b>Asia</b> |           |    |       |        |      |      |   |      |     |   |       |                                   |
| Brunei      | AND-01    | OG | 4.65  | 114.50 | 2989 | 0.26 | 0 | 33   | 45  | 5 | 3     | Banin 2010                        |
|             | BAD-01    | OG | 4.57  | 114.40 | 3040 | 0.24 | 0 | 36   | 41  | 5 | 3     | Banin 2010                        |
|             | BEL-01    | OG | 4.53  | 115.17 | 3387 | 0.14 | 0 | 381  | 45  | 5 | 3     | Banin 2010                        |

|                        |                    |        |        |        |        |      |      |      |      |       |       |                                                       |
|------------------------|--------------------|--------|--------|--------|--------|------|------|------|------|-------|-------|-------------------------------------------------------|
| Cambodia               | Cambodia           | OG     | 10.93  | 103.40 | 3336   | 0.86 | 4    | 14   | 20   | 6     | 3     | Hozumi et al. 1969                                    |
| Indonesia              | Kaliman2           | OG     | -0.27  | 116.97 | 1981   | 0.24 | 0    | 17   | 48   | 3     | 1     | Yamakura et al. 1986                                  |
| Peninsular<br>Malaysia | Pasoh-02           | OG     | 2.98   | 102.31 | 1978   | 0.3  | 0    | 135  | 654  | 6     | 3 & 4 | Y. Iida et al. (in review)                            |
|                        | Pasoh-03           | OG     | 2.98   | 102.31 | 1978   | 0.3  | 0    | 135  | 266  | 6     | 3     | D. King and A. Rahman,<br>(unpublished)<br>Banin 2010 |
| Sarawak,<br>Malaysia   | GMU-01             | OG     | 4.02   | 114.80 | 3798   | 0.15 | 0    | 107  | 56   | 5     | 3     | Banin 2010                                            |
|                        | GMU-02             | OG     | 4.05   | 114.85 | 3634   | 0.14 | 0    | 279  | 64   | 5     | 3     | Banin 2010                                            |
|                        | GMU-03             | OG     | 4.15   | 114.88 | 3571   | 0.15 | 0    | 325  | 64   | 5     | 3     | Banin 2010                                            |
|                        | Lambir-01          | OG     | 4.19   | 114.02 | 2932   | 0.24 | 0    | 128  | 444  | 5     | 3 & 4 | King et al. 2009                                      |
|                        | LMB-06             | OG     | 4.19   | 114.02 | 2932   | 0.24 | 0    | 128  | 57   | 5     | 3     | Banin 2010                                            |
|                        | LMB-07             | OG     | 4.19   | 114.02 | 2932   | 0.24 | 0    | 128  | 51   | 5     | 3     | Banin 2010                                            |
|                        | Semangk-01         | OG     | 3.62   | 101.74 | 2669   | 0.27 | 0    | 435  | 317  | 6     | 3     | A Kassim et al.<br>(unpublished)<br>Berry 2008        |
|                        | Sabah,<br>Malaysia | DVA-01 | OG     | 4.97   | 117.80 | 2321 | 0.14 | 0    | 223  | 40    | 5     | 3                                                     |
| Kinabal-01             |                    | OG     | 6.08   | 116.67 | 2097   | 0.2  | 0    | 2178 | 40   | 2     | 5     | Aiba and Kitayama 1999                                |
| SEP-01                 |                    | OG     | 5.86   | 117.95 | 3098   | 0.37 | 0    | 44   | 43   | 5     | 3     | Banin 2010                                            |
| SEP-02                 |                    | OG     | 5.86   | 117.95 | 3098   | 0.37 | 0    | 44   | 51   | 5     | 3     | Banin 2010                                            |
| Thailand               | SEP-03             | OG     | 5.86   | 117.95 | 3098   | 0.37 | 0    | 44   | 47   | 5     | 3     | Banin 2010                                            |
|                        | Ogawa-1            | OG     | 18.60  | 98.80  | 1085   | 0.84 | 6    | 313  | 73   | 3 & 6 | 1 & 3 | Ogawa et al. 1965                                     |
|                        | Ogawa-4            | OG     | 13.85  | 99.72  | 1114   | 0.81 | 6    | 31   | 88   | 3 & 6 | 1 & 3 | Ogawa et al. 1965                                     |
|                        | Sabhasri-01        | OG     | 14.51  | 101.95 | 1347   | 0.77 | 6    | 315  | 22   | 6     |       | Sabhasri et al. 1968                                  |
|                        | ThaNeal-01         | OG     | 14.709 | 98.98  | 1838   | 0.86 | 6    | 505  | 23   | 6     | 3     | Neal 1967                                             |
|                        | ThaOgi-01          | OG     | 14.45  | 101.8  | 1364   | 0.76 | 5    | 396  | 10   | 6     |       | Ogino et al. 1967                                     |
|                        | ThaOgi-02          | OG     | 14.45  | 101.8  | 1364   | 0.76 | 5    | 396  | 13   | 6     |       | Ogino et al. 1967                                     |
| <b>Australia</b>       |                    |        |        |        |        |      |      |      |      |       |       |                                                       |
| Australia              | AEP-02             | OG     | -17.15 | 145.58 | 2097   | 0.77 | 5    | 812  | 507  | 1     | 3     | Graham et al. 2006                                    |
|                        | AEP-03             | OG     | -17.10 | 145.60 | 1819   | 0.76 | 6    | 963  | 480  | 1     | 3     | Graham et al. 2006                                    |
|                        | AEP-04             | L?     | -17.00 | 145.80 | 2837   | 0.81 | 5    | 14   | 417  | 1     | 3     | Graham et al. 2006                                    |
|                        | AEP-09             | L      | -17.10 | 145.70 | 2673   | 0.79 | 5    | 231  | 456  | 1     | 3     | Graham et al. 2006                                    |
|                        | AEP-18             | OG     | -16.50 | 145.30 | 1669   | 0.86 | 7    | 757  | 429  | 1     | 3     | Graham et al. 2006                                    |
|                        | AEP-19             | OG     | -18.50 | 145.75 | 1536   | 0.9  | 7    | 622  | 461  | 1     | 3     | Graham et al. 2006                                    |
|                        | AEP-29             | OG     | -17.50 | 145.60 | 2230   | 0.75 | 4    | 817  | 454  | 1     | 3     | Graham et al. 2006                                    |
|                        | AEP-30             | OG     | -16.27 | 145.06 | 1568   | 0.91 | 7    | 1054 | 1168 | 1     | 3     | Graham et al. 2006                                    |

|                   |        |        |        |        |      |      |      |     |     |       |                                 |                                             |
|-------------------|--------|--------|--------|--------|------|------|------|-----|-----|-------|---------------------------------|---------------------------------------------|
| AEP-32            | OG     | -13.80 | 143.40 | 1313   | 1.11 | 7    | 412  | 421 | 1   | 3     | Graham et al. 2006              |                                             |
| AEP-33            | OG     | -17.28 | 145.57 | 2160   | 0.76 | 5    | 714  | 269 | 1   | 3     | Graham et al. 2006              |                                             |
| AEP-34            | OG     | -17.42 | 145.77 | 1964   | 0.72 | 6    | 401  | 276 | 1   | 3     | Graham et al. 2006              |                                             |
| AEP-35            | OG     | -16.35 | 145.33 | 1823   | 0.89 | 6    | 193  | 449 | 1   | 3     | Graham et al. 2006              |                                             |
| AEP-37            | L      | -21.30 | 148.60 | 1033   | 0.74 | 8    | 571  | 252 | 1   | 3     | Graham et al. 2006              |                                             |
| AEP-38            | L      | -17.40 | 145.40 | 1266   | 0.83 | 8    | 918  | 345 | 1   | 3     | Graham et al. 2006              |                                             |
| AEP-40            | OG     | -16.28 | 145.10 | 1568   | 0.91 | 7    | 871  | 476 | 1   | 3     | Graham et al. 2006              |                                             |
| AEP-41            | OG     | -16.28 | 145.43 | 1869   | 0.88 | 7    | 29   | 323 | 1   | 3     | Graham et al. 2006              |                                             |
| AEP-42            | OG     | -12.73 | 143.25 | 1846   | 0.93 | 6    | 148  | 228 | 1   | 3     | Graham et al. 2006              |                                             |
| AEP-43            | OG     | -17.30 | 145.40 | 1257   | 0.83 | 8    | 1043 | 357 | 5   | 3 & 4 | Graham et al. 2006              |                                             |
| AEP-44            | OG     | -16.22 | 145.07 | 1525   | 0.9  | 7    | 1011 | 412 | 5   | 3 & 4 | Graham et al. 2006              |                                             |
| CTC-01            | OG     | -16.10 | 145.45 | 1980   | 0.9  | 7    | 384  | 47  | 5   | 3 & 4 | J. Kemp et al.<br>(unpublished) |                                             |
| FMS-02            | OG     | -18.11 | 144.82 | 696    | 1.06 | 8    | 753  | 48  | 5   | 3 & 4 | J. Kemp et al.<br>(unpublished) |                                             |
| KBL-01            | OG     | -17.77 | 145.54 | 1880   | 0.79 | 6    | 681  | 48  | 5   | 3 & 4 | J. Kemp et al.<br>(unpublished) |                                             |
| KBL-03            | OG     | -17.69 | 145.53 | 1426   | 0.79 | 7    | 994  | 48  | 5   | 3 & 4 | J. Kemp et al.<br>(unpublished) |                                             |
| KCR-01            | OG     | -17.11 | 145.60 | 1819   | 0.76 | 6    | 963  | 50  | 5   | 3 & 4 | J. Kemp et al.<br>(unpublished) |                                             |
| RSC-01            | OG     | -20.16 | 146.54 | 670    | 0.83 | 10   | 244  | 50  | 5   | 3 & 4 | J. Kemp et al.<br>(unpublished) |                                             |
| <b>S. America</b> |        |        |        |        |      |      |      |     |     |       |                                 |                                             |
| Bolivia           | ACU-01 | B      | -15.25 | -61.25 | 1264 | 0.66 | 7    | 247 | 92  | 5     | 3 & 4                           | T. Feldpausch et al.<br>(unpublished)       |
|                   | HCC-21 | OG     | -14.53 | -60.74 | 1517 | 0.67 | 5    | 731 | 21  | 5     | 3 & 4                           | T. Feldpausch et al.<br>(unpublished)       |
|                   | HCC-22 | OG     | -14.53 | -60.73 | 1517 | 0.67 | 5    | 731 | 26  | 5     | 3 & 4                           | T. Feldpausch et al.<br>(unpublished)       |
|                   | LFB-01 | OG     | -14.57 | -60.88 | 1449 | 0.68 | 5    | 233 | 89  | 5     | 3 & 4                           | T. Feldpausch et al.<br>(unpublished)       |
|                   | LFB-02 | OG     | -14.58 | -60.83 | 1457 | 0.68 | 5    | 246 | 48  | 5     | 3 & 4                           | T. Feldpausch et al.<br>(unpublished)       |
|                   | LSL-01 | OG     | -14.41 | -61.14 | 1457 | 0.69 | 5    | 192 | 20  | 5     | 3 & 4                           | S. Patiño et al.<br>(unpublished)           |
|                   | LSL-02 | OG     | -14.41 | -61.14 | 1457 | 0.69 | 5    | 192 | 21  | 5     | 3 & 4                           | S. Patiño et al.<br>(unpublished)           |
|                   | OTT-01 | OG     | -16.39 | -61.21 | 1145 | 0.63 | 7    | 442 | 107 | 5     | 3 & 4                           | T. Feldpausch et al.<br>(unpublished)       |
|                   | OTT-03 | B      | -16.42 | -61.19 | 1151 | 0.63 | 7    | 451 | 50  | 5     | 3 & 4                           | T. Feldpausch et al.<br>(unpublished)       |
|                   | RED-05 | OG     | -10.97 | -65.72 | 1663 | 0.66 | 5    | 172 | 360 | 2     | 3                               | E. Arets (unpublished); M.<br>Drescher 1998 |
|                   | RED-06 | OG     | -10.97 | -65.72 | 1663 | 0.66 | 5    | 172 | 344 | 2     | 3                               | E. Arets (unpublished); M.<br>Drescher 1998 |

|        |             |    |        |        |      |      |   |     |     |   |       |                                          |
|--------|-------------|----|--------|--------|------|------|---|-----|-----|---|-------|------------------------------------------|
|        | RED-08      | OG | -10.97 | -65.72 | 1663 | 0.66 | 5 | 172 | 331 | 2 | 3     | E. Arets (unpublished); M. Drescher 1998 |
|        | RED-09      | OG | -10.97 | -65.72 | 1663 | 0.66 | 5 | 172 | 330 | 2 | 3     | E. Arets (unpublished); M. Drescher 1998 |
|        | TUC-01      | OG | -18.52 | -60.81 | 817  | 0.56 | 9 | 310 | 100 | 5 | 3 & 4 | T. Feldpausch et al. (unpublished)       |
| Brazil | ALF-01      | OG | -9.60  | -55.94 | 2350 | 0.7  | 4 | 260 | 67  | 5 | 3 & 4 | T. Feldpausch et al. (unpublished)       |
|        | ALF-02      | OG | -9.58  | -55.92 | 2358 | 0.7  | 4 | 280 | 40  | 5 | 3 & 4 | T. Feldpausch et al. (unpublished)       |
|        | BNT-04      | OG | -2.63  | -60.15 | 2227 | 0.35 | 1 | 94  | 38  | 5 | 3     | Baker et al. 2009                        |
|        | BraBAIt-01  | S  | -3.28  | -52.40 | 1784 | 0.71 | 6 | 158 | 211 | 6 | 3     | E. Brondizio et al. (unpublished)        |
|        | BraBAIt-02  | S  | -3.28  | -52.40 | 1784 | 0.71 | 6 | 158 | 70  | 6 | 3     | E. Brondizio et al. (unpublished)        |
|        | BraBAIt-03  | S  | -3.28  | -52.40 | 1784 | 0.71 | 6 | 158 | 102 | 6 | 3     | E. Brondizio et al. (unpublished)        |
|        | BraBAIt-06  | S  | -3.28  | -52.40 | 1784 | 0.71 | 6 | 158 | 108 | 6 | 3     | E. Brondizio et al. (unpublished)        |
|        | BraBAIt-07  | S  | -3.28  | -52.40 | 1784 | 0.71 | 6 | 158 | 77  | 6 | 3     | E. Brondizio et al. (unpublished)        |
|        | BraBAIt-08  | S  | -3.28  | -52.40 | 1784 | 0.71 | 6 | 158 | 141 | 6 | 3     | E. Brondizio et al. (unpublished)        |
|        | BraBAIt-13  | S  | -3.28  | -52.40 | 1784 | 0.71 | 6 | 158 | 98  | 6 | 3     | E. Brondizio et al. (unpublished)        |
|        | BraBAIt-14  | S  | -3.28  | -52.40 | 1784 | 0.71 | 6 | 158 | 103 | 6 | 3     | E. Brondizio et al. (unpublished)        |
|        | BraBBrag-01 | S  | -1.10  | -53.56 | 1812 | 0.53 | 5 | 256 | 76  | 6 | 3     | E. Brondizio et al. (unpublished)        |
|        | BraBBrag-02 | S  | -1.10  | -53.56 | 1812 | 0.53 | 5 | 256 | 94  | 6 | 3     | E. Brondizio et al. (unpublished)        |
|        | BraBBrag-04 | S  | -1.10  | -53.56 | 1812 | 0.53 | 5 | 256 | 53  | 6 | 3     | E. Brondizio et al. (unpublished)        |
|        | BraBBrag-06 | S  | -1.10  | -53.56 | 1812 | 0.53 | 5 | 256 | 55  | 6 | 3     | E. Brondizio et al. (unpublished)        |
|        | BraBBrag-10 | S  | -1.10  | -53.56 | 1812 | 0.53 | 5 | 256 | 59  | 6 | 3     | E. Brondizio et al. (unpublished)        |
|        | BraBBrag-11 | S  | -1.10  | -53.56 | 1812 | 0.53 | 5 | 256 | 53  | 6 | 3     | E. Brondizio et al. (unpublished)        |
|        | BraBBrag-20 | S  | -1.10  | -53.56 | 1812 | 0.53 | 5 | 256 | 94  | 6 | 3     | E. Brondizio et al. (unpublished)        |
|        | BraBBrag-24 | S  | -1.10  | -53.56 | 1812 | 0.53 | 5 | 256 | 76  | 6 | 3     | E. Brondizio et al. (unpublished)        |
|        | BraBBrag-25 | S  | -1.10  | -53.56 | 1812 | 0.53 | 5 | 256 | 50  | 6 | 3     | E. Brondizio et al. (unpublished)        |
|        | BraBBrag-27 | S  | -1.10  | -53.56 | 1812 | 0.53 | 5 | 256 | 22  | 6 | 3     | E. Brondizio et al. (unpublished)        |
|        | BraBPP-01   | S  | -1.39  | -48.87 | 2447 | 0.63 | 4 | 9   | 46  | 6 | 3     | E. Brondizio et al. (unpublished)        |
|        | BraBPP-03   | S  | -1.39  | -48.87 | 2447 | 0.63 | 4 | 9   | 83  | 6 | 3     | E. Brondizio et al. (unpublished)        |
|        | BraBPP-04   | S  | -1.39  | -48.87 | 2447 | 0.63 | 4 | 9   | 66  | 6 | 3     | E. Brondizio et al. (unpublished)        |
|        | BraBPP-06   | S  | -1.39  | -48.87 | 2447 | 0.63 | 4 | 9   | 223 | 6 | 3     | E. Brondizio et al.                      |

|            |    |        |        |      |      |   |     |     |   |       |                                             |
|------------|----|--------|--------|------|------|---|-----|-----|---|-------|---------------------------------------------|
|            |    |        |        |      |      |   |     |     |   |       | (unpublished)                               |
| BraBPP-10  | S  | -1.39  | -48.87 | 2447 | 0.63 | 4 | 9   | 147 | 6 | 3     | E. Brondizio et al.<br>(unpublished)        |
| BraBPP-15  | S  | -1.39  | -48.87 | 2447 | 0.63 | 4 | 9   | 394 | 6 | 3     | E. Brondizio et al.<br>(unpublished)        |
| BraBPP-25  | S  | -1.39  | -48.87 | 2447 | 0.63 | 4 | 9   | 209 | 6 | 3     | E. Brondizio et al.<br>(unpublished)        |
| BraBTom-01 | S  | -2.37  | -48.26 | 2480 | 0.68 | 5 | 42  | 32  | 6 | 3     | E. Brondizio et al.<br>(unpublished)        |
| BraBTom-02 | S  | -2.37  | -48.26 | 2480 | 0.68 | 5 | 42  | 139 | 6 | 3     | E. Brondizio et al.<br>(unpublished)        |
| BraBTom-05 | S  | -2.37  | -48.26 | 2480 | 0.68 | 5 | 42  | 27  | 6 | 3     | E. Brondizio et al.<br>(unpublished)        |
| BraBTom-10 | S  | -2.37  | -48.26 | 2480 | 0.68 | 5 | 42  | 66  | 6 | 3     | E. Brondizio et al.<br>(unpublished)        |
| BraBTom-11 | S  | -2.37  | -48.26 | 2480 | 0.68 | 5 | 42  | 121 | 6 | 3     | E. Brondizio et al.<br>(unpublished)        |
| BraBTom-12 | S  | -2.37  | -48.26 | 2480 | 0.68 | 5 | 42  | 83  | 6 | 3     | E. Brondizio et al.<br>(unpublished)        |
| BraBTom-13 | S  | -2.37  | -48.26 | 2480 | 0.68 | 5 | 42  | 69  | 6 | 3     | E. Brondizio et al.<br>(unpublished)        |
| BraBTom-14 | S  | -2.37  | -48.26 | 2480 | 0.68 | 5 | 42  | 33  | 6 | 3     | E. Brondizio et al.<br>(unpublished)        |
| BraBTom-15 | S  | -2.37  | -48.26 | 2480 | 0.68 | 5 | 42  | 66  | 6 | 3     | E. Brondizio et al.<br>(unpublished)        |
| BraBTom-16 | S  | -2.37  | -48.26 | 2480 | 0.68 | 5 | 42  | 70  | 6 | 3     | E. Brondizio et al.<br>(unpublished)        |
| BraBTom-17 | S  | -2.37  | -48.26 | 2480 | 0.68 | 5 | 42  | 68  | 6 | 3     | E. Brondizio et al.<br>(unpublished)        |
| BraCAU     | OG | -3.73  | -48.29 | 1983 | 0.85 | 6 | 138 | 304 | 5 | 4     | Asner et al. 2002, Palace et<br>al. 2008    |
| BraCotN    | OG | -9.88  | -58.42 | 1977 | 0.74 | 5 | 269 | 105 |   |       | Nogueira et al. 2008                        |
| BraMAO     | OG | -2.58  | -60.12 | 2208 | 0.33 | 1 | 102 | 626 | 5 | 4     | Lesky et al. 2005                           |
| BraPara3   | S  | -1.50  | -48.50 | 2643 | 0.52 | 2 | 12  | 19  |   |       | Chave et al. 2005                           |
| BraRond    | OG | -8.75  | -63.38 | 2266 | 0.63 | 3 | 83  | 8   |   |       | Chave et al. 2005                           |
| BraSTM     | OG | -2.86  | -54.96 | 1993 | 0.45 | 5 | 82  | 309 | 5 | 4     | Lesky et al. 2005                           |
| BraTAN     | OG | -13.01 | -52.39 | 1640 | 0.79 | 5 | 379 | 300 | 5 | 4     | Lesky et al. 2005                           |
| CAX-01     | OG | -1.74  | -51.46 | 2198 | 0.51 | 4 | 43  | 20  | 6 | 3     | S. Patiño and C.A. Quesada<br>(unpublished) |
| CAX-02     | OG | -1.74  | -51.46 | 2198 | 0.51 | 4 | 43  | 17  | 6 | 3     | S. Patiño and C.A. Quesada<br>(unpublished) |
| CAX-03     | OG | -1.74  | -51.46 | 2198 | 0.51 | 4 | 43  | 73  | 5 | 3     | Baker et al. 2009                           |
| DOI-01     | OG | -10.57 | -68.32 | 1911 | 0.56 | 5 | 203 | 79  | 5 | 3 & 4 | T. Feldpausch et al.<br>(unpublished)       |
| DOI-02     | OG | -10.55 | -68.31 | 1911 | 0.56 | 5 | 203 | 60  | 5 | 3 & 4 | T. Feldpausch et al.<br>(unpublished)       |
| FLO-01     | OG | -12.81 | -51.85 | 1613 | 0.79 | 5 | 371 | 49  | 5 | 3 & 4 | T. Feldpausch et al.<br>(unpublished)       |



|          |            |    |        |        |      |      |   |     |     |   |       |                                             |
|----------|------------|----|--------|--------|------|------|---|-----|-----|---|-------|---------------------------------------------|
|          | JRI-01     | OG | -0.89  | -52.19 | 2385 | 0.51 | 3 | 82  | 13  | 6 | 3     | S. Patino and T. R. Baker<br>(unpublished)  |
|          | JFR-01     | OG | -10.48 | -58.49 | 1881 | 0.75 | 5 | 293 | 67  | 5 | 3     | T. Feldpausch et al.<br>(unpublished)       |
|          | JFR -02    | OG | -10.48 | -58.49 | 1881 | 0.75 | 5 | 293 | 44  | 5 | 3     | T. Feldpausch et al.<br>(unpublished)       |
|          | JFR -03    | OG | -10.48 | -58.49 | 1881 | 0.75 | 5 | 293 | 67  | 5 | 3     | T. Feldpausch et al.<br>(unpublished)       |
|          | JFR -04    | OG | -10.48 | -58.49 | 1881 | 0.75 | 5 | 293 | 131 | 5 | 3     | T. Feldpausch et al.<br>(unpublished)       |
|          | JFR -05    | OG | -10.48 | -58.49 | 1881 | 0.75 | 5 | 293 | 122 | 5 | 3     | T. Feldpausch et al.<br>(unpublished)       |
|          | JFR -06    | OG | -10.48 | -58.49 | 1881 | 0.75 | 5 | 293 | 94  | 5 | 3     | T. Feldpausch et al.<br>(unpublished)       |
|          | JFR -07    | OG | -10.48 | -58.49 | 1881 | 0.75 | 5 | 293 | 197 | 5 | 3     | T. Feldpausch et al.<br>(unpublished)       |
|          | JFR -08    | OG | -10.48 | -58.49 | 1881 | 0.75 | 5 | 293 | 113 | 5 | 3     | T. Feldpausch et al.<br>(unpublished)       |
|          | JFR -09    | OG | -10.48 | -58.49 | 1881 | 0.75 | 5 | 293 | 80  | 5 | 3     | T. Feldpausch et al.<br>(unpublished)       |
|          | Juruena-10 | OG | -10.48 | -58.49 | 1881 | 0.75 | 5 | 293 | 35  | 5 | 1     | Nogueira et al. 2008                        |
|          | MIN-01     | OG | -8.56  | -72.88 | 1878 | 0.5  | 4 | 230 | 59  | 5 | 3 & 4 | T. Feldpausch et al.<br>(unpublished)       |
|          | NXV-02     | OG | -14.70 | -52.35 | 1498 | 0.81 | 5 | 289 | 33  | 5 | 3 & 4 | T. Feldpausch et al.<br>(unpublished)       |
|          | POR-01     | OG | -10.82 | -68.78 | 1694 | 0.59 | 5 | 268 | 76  | 5 | 3 & 4 | T. Feldpausch et al.<br>(unpublished)       |
|          | POR-02     | OG | -10.80 | -68.77 | 1694 | 0.59 | 5 | 268 | 62  | 5 | 3 & 4 | T. Feldpausch et al.<br>(unpublished)       |
|          | RST-01     | OG | -9.04  | -72.27 | 1804 | 0.52 | 4 | 279 | 18  | 5 | 3 & 4 | T. Feldpausch et al.<br>(unpublished)       |
|          | SIP-01     | OG | -11.41 | -55.32 | 1852 | 0.76 | 5 | 341 | 75  | 5 | 3 & 4 | C. A. Quesada and J. Lloyd<br>(unpublished) |
|          | SMT-02     | OG | -12.82 | -51.77 | 1604 | 0.79 | 5 | 332 | 49  | 5 | 3 & 4 | T. Feldpausch et al.<br>(unpublished)       |
|          | TAN-02     | OG | -13.09 | -52.38 | 1640 | 0.79 | 5 | 379 | 506 | 5 | 3 & 4 | T. Feldpausch et al.<br>(unpublished)       |
|          | TAN-03     | OG | -12.82 | -52.36 | 1640 | 0.79 | 5 | 379 | 589 | 5 | 3 & 4 | B. Marimon et al.<br>(unpublished)          |
|          | TAN-04     | OG | -12.92 | -52.37 | 1654 | 0.79 | 5 | 381 | 49  | 5 | 3 & 4 | B. Marimon et al.<br>(unpublished)          |
|          | VCR-01     | OG | -14.83 | -52.16 | 1509 | 0.81 | 6 | 285 | 40  | 5 | 3 & 4 | T. Feldpausch et al.<br>(unpublished)       |
|          | VCR-02     | OG | -14.83 | -52.17 | 1509 | 0.81 | 5 | 280 | 48  | 5 | 3 & 4 | T. Feldpausch et al.<br>(unpublished)       |
| Colombia | AGP-01     | OG | -3.68  | -70.30 | 2809 | 0.21 | 0 | 110 | 18  | 6 | 3     | S. Patiño et al.<br>(unpublished)           |
|          | AGP-02     | OG | -3.68  | -70.30 | 2809 | 0.21 | 0 | 110 | 20  | 6 | 3     | S. Patiño et al.<br>(unpublished)           |
|          | LOR-01     | OG | -3.06  | -69.99 | 2812 | 0.2  | 0 | 98  | 10  | 6 | 3     | S. Patiño et al.<br>(unpublished)           |
|          | LOR-02     | OG | -3.06  | -69.99 | 2812 | 0.2  | 0 | 98  | 14  | 6 | 3     | S. Patiño et al.<br>(unpublished)           |
| Ecuador  | BOG-01     | OG | -0.70  | -76.48 | 3166 | 0.16 | 0 | 264 | 65  | 5 | 3     | Baker et al. 2009                           |

|               |           |    |        |         |      |      |   |     |     |   |       |                                            |
|---------------|-----------|----|--------|---------|------|------|---|-----|-----|---|-------|--------------------------------------------|
|               | BOG-02    | OG | -0.70  | -76.47  | 3166 | 0.16 | 0 | 264 | 32  | 6 | 3     | S. Patiño (unpublished)                    |
|               | JAS-02    | OG | -1.07  | -77.60  | 3654 | 0.22 | 0 | 398 | 45  | 5 | 3     | Baker et al. 2009; S. Patiño (unpublished) |
|               | JAS-03    | OG | -1.07  | -77.67  | 3762 | 0.22 | 0 | 446 | 40  | 5 | 3     | Baker et al. 2009; S. Patiño (unpublished) |
|               | JAS-04    | OG | -1.07  | -77.67  | 3869 | 0.22 | 0 | 446 | 17  | 6 | 3     | S. Patiño (unpublished)                    |
|               | JAS-05    | OG | -1.07  | -77.67  | 3762 | 0.22 | 0 | 446 | 39  | 5 | 3     | Baker et al. 2009; S. Patiño (unpublished) |
|               | SUM-06    | OG | -1.75  | -77.63  | 3669 | 0.15 | 0 | 511 | 16  | 6 | 3     | S. Patiño (unpublished)                    |
|               | TIP-03    | OG | -0.638 | -76.144 | 3009 | 0.18 | 0 | 232 | 40  | 5 | 3     | Baker et al. 2009                          |
| French Guiana | FrenchGu  | OG | 5.33   | -53.50  | 2570 | 0.4  | 2 | 90  | 187 | 5 | 1     | Chave et al. 2005                          |
|               | NOU-01-04 | OG | 4.08   | -52.68  | 3299 | 0.47 | 2 | 131 | 31  | 5 | 3 & 4 | T. Feldpausch et al. (unpublished)         |
|               | NOU-02    | OG | 4.08   | -52.68  | 3299 | 0.47 | 2 | 131 | 493 | 1 | 3     | J. Chave et al. (unpublished)              |
|               | NOU-11    | OG | 4.08   | -52.68  | 3299 | 0.47 | 2 | 131 | 454 | 1 | 3     | J. Chave et al. (unpublished)              |
| Guyana        | Pibiri-1  | OG | 5.03   | -58.62  | 2636 | 0.44 | 1 | 90  | 273 | 6 | 3     | E. Arets et al. (unpublished)              |
|               | Pibiri-10 | OG | 5.03   | -58.62  | 2636 | 0.44 | 1 | 90  | 146 | 6 | 3     | E. Arets et al. (unpublished)              |
|               | Pibiri-11 | OG | 5.03   | -58.62  | 2636 | 0.44 | 1 | 90  | 224 | 6 | 3     | E. Arets et al. (unpublished)              |
|               | Pibiri-12 | OG | 5.03   | -58.62  | 2636 | 0.44 | 1 | 90  | 109 | 6 | 3     | E. Arets et al. (unpublished)              |
|               | Pibiri-13 | OG | 5.03   | -58.62  | 2636 | 0.44 | 1 | 90  | 41  | 6 | 3     | E. Arets et al. (unpublished)              |
|               | Pibiri-14 | OG | 5.03   | -58.62  | 2636 | 0.44 | 1 | 90  | 52  | 6 | 3     | E. Arets et al. (unpublished)              |
|               | Pibiri-15 | OG | 5.03   | -58.62  | 2636 | 0.44 | 1 | 90  | 79  | 6 | 3     | E. Arets et al. (unpublished)              |
|               | Pibiri-2  | OG | 5.03   | -58.62  | 2636 | 0.44 | 1 | 90  | 222 | 6 | 3     | E. Arets et al. (unpublished)              |
|               | Pibiri-3  | OG | 5.03   | -58.62  | 2636 | 0.44 | 1 | 90  | 363 | 6 | 3     | E. Arets et al. (unpublished)              |
|               | Pibiri-4  | OG | 5.03   | -58.62  | 2636 | 0.44 | 1 | 90  | 210 | 6 | 3     | E. Arets et al. (unpublished)              |
|               | Pibiri-5  | OG | 5.03   | -58.62  | 2636 | 0.44 | 1 | 90  | 378 | 6 | 3     | E. Arets et al. (unpublished)              |
|               | Pibiri-6  | OG | 5.03   | -58.62  | 2636 | 0.44 | 1 | 90  | 199 | 6 | 3     | E. Arets et al. (unpublished)              |
|               | Pibiri-7  | OG | 5.03   | -58.62  | 2636 | 0.44 | 1 | 90  | 103 | 6 | 3     | E. Arets et al. (unpublished)              |
|               | Pibiri-8  | OG | 5.03   | -58.62  | 2636 | 0.44 | 1 | 90  | 203 | 6 | 3     | E. Arets et al. (unpublished)              |
|               | Pibiri-9  | OG | 5.03   | -58.62  | 2636 | 0.44 | 1 | 90  | 103 | 6 | 3     | E. Arets et al. (unpublished)              |
| Peru          | ALP-11    | OG | -3.95  | -73.43  | 2772 | 0.18 | 0 | 129 | 29  | 5 | 3     | Baker et al. 2009                          |
|               | ALP-12    | OG | -3.95  | -73.44  | 2772 | 0.18 | 0 | 129 | 10  | 5 | 3     | Baker et al. 2009                          |
|               | ALP-21    | OG | -3.95  | -73.44  | 2772 | 0.18 | 0 | 129 | 28  | 5 | 3     | Baker et al. 2009                          |
|               | ALP-22    | OG | -3.95  | -73.44  | 2772 | 0.18 | 0 | 129 | 13  | 5 | 3     | Baker et al. 2009                          |
|               | ALP-30    | OG | -3.95  | -73.43  | 2772 | 0.18 | 0 | 129 | 40  | 5 | 3     | Baker et al. 2009                          |

|           |        |    |        |        |      |      |   |     |     |   |       |                                              |
|-----------|--------|----|--------|--------|------|------|---|-----|-----|---|-------|----------------------------------------------|
|           | CUZ-01 | OG | -12.58 | -69.15 | 2081 | 0.55 | 4 | 198 | 41  | 5 | 3     | Baker et al. 2009                            |
|           | CUZ-02 | OG | -12.58 | -69.15 | 2081 | 0.55 | 4 | 198 | 39  | 5 | 3     | Baker et al. 2009                            |
|           | CUZ-03 | OG | -12.50 | -68.96 | 2081 | 0.55 | 4 | 197 | 42  | 5 | 3     | Baker et al. 2009                            |
|           | CUZ-04 | OG | -12.56 | -69.13 | 2081 | 0.55 | 4 | 198 | 42  | 5 | 3     | Baker et al. 2009                            |
|           | LAS-02 | OG | -12.53 | -70.08 | 3191 | 0.46 | 0 | 258 | 50  | 5 | 3 & 4 | T. Feldpausch et al.<br>(unpublished)        |
|           | SUC-01 | OG | -3.25  | -72.91 | 2799 | 0.17 | 0 | 108 | 43  | 5 | 3     | Baker et al. 2009                            |
|           | SUC-02 | OG | -3.25  | -72.90 | 2799 | 0.17 | 0 | 108 | 42  | 5 | 3     | Baker et al. 2009                            |
|           | SUC-03 | OG | -3.25  | -72.92 | 2813 | 0.17 | 0 | 112 | 36  | 5 | 3     | Baker et al. 2009                            |
|           | SUC-04 | OG | -3.25  | -72.89 | 2799 | 0.17 | 0 | 108 | 39  | 5 | 3     | Baker et al. 2009                            |
|           | SUC-05 | OG | -3.26  | -72.90 | 2799 | 0.17 | 0 | 108 | 41  | 5 | 3     | Baker et al. 2009                            |
|           | TAM-01 | OG | -12.84 | -69.29 | 2492 | 0.52 | 3 | 215 | 41  | 5 | 3     | Baker et al. 2009                            |
|           | TAM-02 | OG | -12.84 | -69.29 | 2492 | 0.52 | 3 | 215 | 39  | 5 | 3     | Baker et al. 2009                            |
|           | TAM-03 | OG | -12.84 | -69.28 | 2492 | 0.52 | 3 | 215 | 39  | 5 | 3     | Baker et al. 2009                            |
|           | TAM-04 | OG | -12.84 | -69.28 | 2492 | 0.52 | 3 | 215 | 14  | 5 | 3     | Baker et al. 2009                            |
|           | TAM-05 | OG | -12.83 | -69.27 | 2475 | 0.53 | 3 | 213 | 39  | 5 | 3     | Baker et al. 2009                            |
|           | TAM-06 | OG | -12.84 | -69.30 | 2536 | 0.52 | 3 | 208 | 40  | 5 | 3     | Baker et al. 2009                            |
|           | TAM-07 | OG | -12.83 | -69.26 | 2458 | 0.53 | 3 | 213 | 38  | 5 | 3     | Baker et al. 2009                            |
|           | TAM-08 | OG | -12.83 | -69.28 | 2492 | 0.52 | 3 | 213 | 40  | 5 | 3     | Baker et al. 2009                            |
|           | YAN-01 | OG | -3.44  | -72.85 | 2809 | 0.19 | 0 | 104 | 41  | 5 | 3     | Baker et al. 2009                            |
|           | YAN-02 | OG | -3.43  | -72.84 | 2809 | 0.19 | 0 | 104 | 39  | 5 | 3     | Baker et al. 2009                            |
| Venezuela | ELD-01 | OG | 6.10   | -61.40 | 2502 | 0.38 | 1 | 329 | 127 | 6 | 3     | J. P. Veillon and S. Patiño<br>(unpublished) |
|           | ELD-02 | OG | 6.10   | -61.40 | 2502 | 0.38 | 1 | 329 | 134 | 6 | 3     | J. P. Veillon and S. Patiño<br>(unpublished) |
|           | ELD-03 | OG | 6.08   | -61.40 | 2350 | 0.38 | 2 | 407 | 133 | 6 | 3     | J. P. Veillon and S. Patiño<br>(unpublished) |
|           | ELD-04 | OG | 6.08   | -61.41 | 2350 | 0.38 | 2 | 407 | 193 | 6 | 3     | J. P. Veillon and S. Patiño<br>(unpublished) |
|           | RIO-01 | OG | 8.11   | -61.69 | 1347 | 0.41 | 4 | 293 | 143 | 6 | 3     | J. P. Veillon and S. Patiño<br>(unpublished) |
|           | RIO-02 | OG | 8.11   | -61.69 | 1347 | 0.41 | 4 | 293 | 171 | 6 | 3     | J. P. Veillon and S. Patiño<br>(unpublished) |
|           | SCR-04 | OG | 1.93   | -67.04 | 3423 | 0.24 | 0 | 106 | 23  | 6 | 3     | S. Patiño & J. Lloyd<br>(unpublished)        |
|           | SCR-05 | OG | 1.93   | -67.04 | 3423 | 0.24 | 0 | 106 | 28  | 6 | 3     | S. Patiño & J. Lloyd<br>(unpublished)        |
|           | SCR-X1 | OG | 1.93   | -67.04 | 3423 | 0.24 | 0 | 106 | 69  | 2 | 3     | E. Brüning et. al.<br>(unpublished)          |
|           | SCR-X2 | OG | 1.93   | -67.04 | 3423 | 0.24 | 0 | 106 | 73  | 2 | 3     | E. Brüning et. al.<br>(unpublished)          |

---

|        |    |      |        |      |      |   |     |    |   |   |                                    |
|--------|----|------|--------|------|------|---|-----|----|---|---|------------------------------------|
| SCR-X3 | OG | 1.93 | -67.04 | 3423 | 0.24 | 0 | 106 | 86 | 2 | 3 | E. Brünig et. al.<br>(unpublished) |
| SCR-X4 | OG | 1.93 | -67.04 | 3423 | 0.24 | 0 | 106 | 96 | 2 | 3 | E. Brünig et. al.<br>(unpublished) |
| SCR-X5 | OG | 1.93 | -67.04 | 3423 | 0.24 | 0 | 106 | 95 | 2 | 3 | E. Brünig et. al.<br>(unpublished) |

---

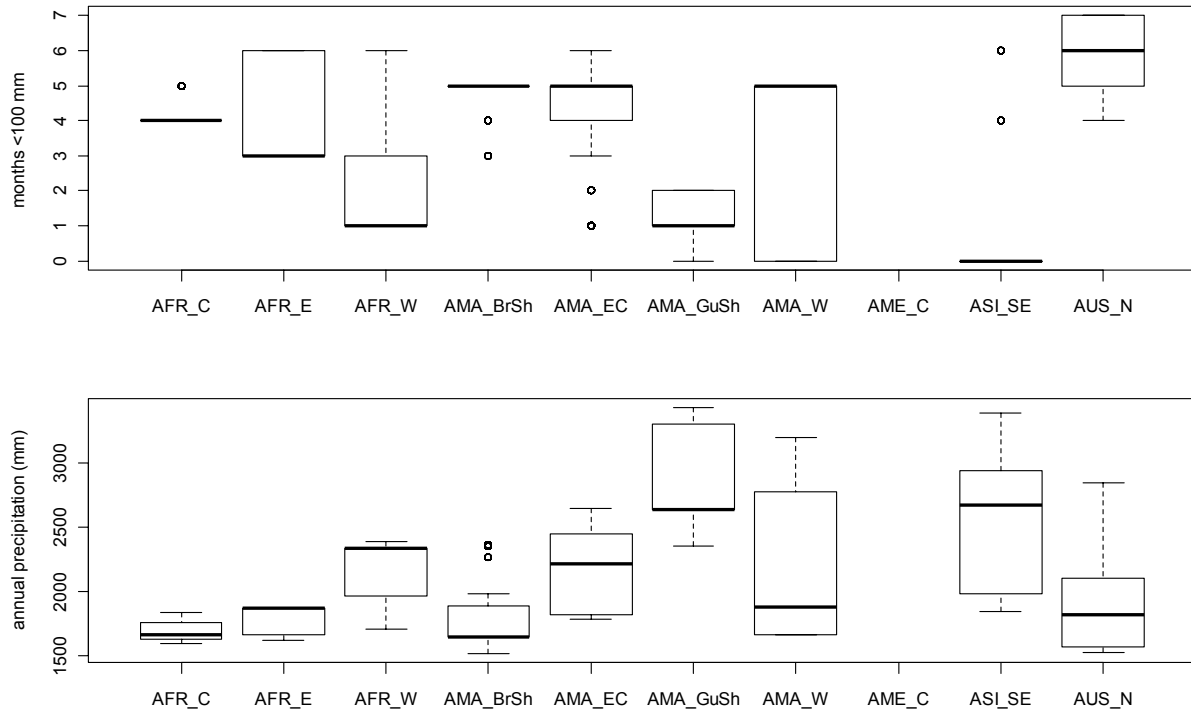

Figure S1: Mean precipitation (mm) and dry season (months <100 mm) by regional clusters for the study sites in Africa, Asia, Australia and South America.

Table S2: Allometric model form and coding fit by ordinary least squares and multi-level models relating tree height ( $H$ ) to bole diameter at 1.3 m height ( $D$ ) and environment ( $E_x$ : annual precipitation coefficient of variance ( $P_A$ ), dry season ( $S_D$ ), mean annual temperature ( $T_A$ )) and forest structure ( $S_x$ : basal area  $A$ ). The fitted parameters are:  $a, b, c, d, e, H_{max}$  where  $H_{max}$  represents the asymptotic tree height fitted by non-linear regression.

| <i>Form</i> | <i>Description</i>    | <i>Equation</i><br><br>( <i>P, C, R, S</i> ) | <i>Equation</i><br>+ <i>Structure</i><br>( <i>PS, CS, RS</i> ) | <i>Equation</i><br>+ <i>Environment</i><br>( <i>PE, CE, RE</i> ) | <i>Equation + Environment + Structure</i><br>( <i>PES, CES, RES</i> ) |
|-------------|-----------------------|----------------------------------------------|----------------------------------------------------------------|------------------------------------------------------------------|-----------------------------------------------------------------------|
| 1           | ln                    | $y = a + b \ln(x)$                           | $y = a + b \ln(x) + S_x$                                       | $y = a + b \ln(x) + E_x$                                         | $y = a + b \ln(x) + E_x + S_x$                                        |
| 2           | ln-ln                 | $y = \exp(a + b \ln(x))$                     | $y = \exp(a + b \ln(x) + S_x)$                                 | $y = \exp(a + b \ln(x) + E_x)$                                   | $y = \exp(a + b \ln(x) + E_x + S_x)$                                  |
| 3           | Weibull               | $y = H_{max} (1 - \exp(-ax^b))$              | $y = H_{max} (1 - \exp(-ax^b)) + S_x$                          | $y = H_{max} (1 - \exp(-ax^b)) + E_x$                            | $y = H_{max} (1 - \exp(-ax^b)) + E_x + S_x$                           |
| 4           | Monomolecular         | $y = H_{max} * (1 - \exp(a - b * x))$        | $y = H_{max} * (1 - \exp(a - b * x)) + S_x$                    | $y = H_{max} * (1 - \exp(a - b * x)) + E_x$                      | $y = H_{max} * (1 - \exp(a - b * x)) + E_x + S_x$                     |
| 5           | Rectangular hyperbola | $y = ((H_{max} * x) / (a + x)) - b$          | $y = ((H_{max} * x) / (a + x)) - b + S_x$                      | $y = ((H_{max} * x) / (a + x)) - b + E_x$                        | $y = ((H_{max} * x) / (a + x)) - b + E_x + S_x$                       |

  

| <i>Type</i> | <i>Description</i>                                 | <i>Division in height-diameter relationship</i> | <i>Source</i>     |
|-------------|----------------------------------------------------|-------------------------------------------------|-------------------|
| P           | Pan-tropical                                       | none                                            | this study        |
| PS          | Pan-tropical-Structure                             | forest structure                                | this study        |
| PE          | Pan-tropical-Environment                           | environment                                     | this study        |
| PES         | Pan-tropical-Environment- Structure                | environment, forest structure                   | this study        |
| C           | Continent                                          | Continent                                       | this study        |
| CS          | Continent-Structure                                | Continent, forest structure                     | this study        |
| CE          | Continent-Environment                              | Continent, environment                          | this study        |
| CES         | Continent-Environment- Structure                   | Continent, environment and forest structure     | this study        |
| R           | Region                                             | Region                                          | this study        |
| RS          | Region-Structure                                   | Region, forest structure                        | this study        |
| RE          | Region-Environment                                 | Region, environment                             | this study        |
| RES         | Region-Environment- Structure                      | Region, environment and forest structure        | this study        |
| S           | Site-specific                                      | Site                                            | this study        |
| CCS         | Continent-dry, moist, wet Classification-Structure | Continent, forest moisture class and structure  | this study        |
| RCS         | Region-dry, moist, wet Classification-Structure    | Region, forest moisture class and structure     | this study        |
| BrownMoist  | Brown pan-tropical moist                           | precipitation                                   | Brown et al. 1989 |
| BrownWet    | Brown pan-tropical wet                             | precipitation                                   | Brown et al. 1989 |

Table S3: Statistical tests using multilevel mixed-effects and ordinary least squares models to examine the  $\log(H):\log(D)$  relationship and percent of the variance partitioned by hierarchical structure (random slope random intercept: plot random) for tree height ( $H$ , m) and diameter ( $D$ , dm), Pan-tropical (P), Continent (C) or Region (R), environment\*, and tree basal area ( $A$ , m<sup>2</sup>/ha) for wet to dry pan-tropical forests. Models were compared by ANOVA or likelihood ratio test. Models are presented in increasing order of complexity. See Table 3 for model coefficients.

| Model code                                                                                                                                              | Question, model                 | Model type***           | Multilevel random structure | AIC     | Model comparison | $p$    |
|---------------------------------------------------------------------------------------------------------------------------------------------------------|---------------------------------|-------------------------|-----------------------------|---------|------------------|--------|
| <b>1. Is there hierarchical structure to the data?</b>                                                                                                  |                                 |                         |                             |         |                  |        |
| 1a                                                                                                                                                      | $\ln(H)=1$                      | OLS                     | none                        | 49698.4 | NA               | NA     |
| 1b                                                                                                                                                      | $\ln(H)=1$                      | unconditional mean null | Plot                        | 35863.1 | 1a vs 1b**       | <0.001 |
| 1c                                                                                                                                                      | $\ln(H)=\ln(D)$                 | OLS                     | none                        | 14514.7 | 1b vs 1c**       | <0.001 |
| 1d                                                                                                                                                      | $\ln(H)=\ln(D)$                 | random intercepts       | Plot                        | -768.3  | 1c vs 1d**       | <0.001 |
| P                                                                                                                                                       | $\ln(H)=\ln(D)$                 | RI, RS                  | Plot                        | -1861.2 | 1d vs 2m**       | <0.001 |
| <b>2. Do the slope and intercept of the H:D relationship differ by Continent (C), Region (R)?</b>                                                       |                                 |                         |                             |         |                  |        |
| C                                                                                                                                                       | $\ln(H)=\ln(D)*C$               | RI, RS                  | Plot                        | -1945.6 | P2 vs C2         | <0.001 |
| R                                                                                                                                                       | $\ln(H)=\ln(D)*R$               | RI, RS                  | Plot                        | -2027.9 | C2 vs R2         | <0.001 |
| <b>3. Do the slope and intercept of the H:D relationship differ by Continent (C), Region (R) after accounting for forest structure (basal area, A)?</b> |                                 |                         |                             |         |                  |        |
| PS                                                                                                                                                      | $\ln(H)=\ln(D)+A$               | RI, RS                  | Plot                        | -1907.5 | P2 vs PS2        | <0.001 |
| CS                                                                                                                                                      | $\ln(H)=\ln(D)*C+A$             | RI, RS                  | Plot                        | -2031.5 | PS2 vs CS2       | <0.001 |
| RS                                                                                                                                                      | $\ln(H)=\ln(D)*R+A$             | RI, RS                  | Plot                        | -2123.7 | CS2 vs RS2       | <0.001 |
| <b>4. Do the slope and intercept of the H:D relationship differ by Continent (C), Region (R) after accounting for environment*?</b>                     |                                 |                         |                             |         |                  |        |
| PE                                                                                                                                                      | $\ln(H)=\ln(D)+P_V+S_D+T_A$     | RI, RS                  | Plot                        | -1950.4 | P2 vs PE2        | <0.001 |
| CE                                                                                                                                                      | $\ln(H)=\ln(D)*C+P_V+S_D+T_A$   | RI, RS                  | Plot                        | -2025.7 | PE2 vs CE2       | <0.001 |
| RE                                                                                                                                                      | $\ln(H)=\ln(D)*R+P_V+S_D+T_A$   | RI, RS                  | Plot                        | -2050.5 | CE2 vs RE2       | <0.001 |
| <b>5. Do the slope and intercept of the H:D relationship differ by Continent (C), Region (R) after accounting for environment+structure?</b>            |                                 |                         |                             |         |                  |        |
| PES                                                                                                                                                     | $\ln(H)=\ln(D)+A+P_V+S_D+T_A$   | RI, RS                  | Plot                        | -2037.4 | PE2 vs PES2      | <0.001 |
| CES                                                                                                                                                     | $\ln(H)=\ln(D)*C+A+P_V+S_D+T_A$ | RI, RS                  | Plot                        | -2122.6 | PES2 vs CES2     | <0.001 |
| RES                                                                                                                                                     | $\ln(H)=\ln(D)*R+A+P_V+S_D+T_A$ | RI, RS                  | Plot                        | -2156.0 | CES2 vs RES2     | <0.001 |
| CCS                                                                                                                                                     | $\ln(H)=\ln(D)*C+A+F_M$         | RI, RS                  | Plot                        | -2068.9 | CS2 vs CM2       | <0.001 |
| RCS                                                                                                                                                     | $\ln(H)=\ln(D)*R+A+F_M$         | RI, RS                  | Plot                        | -2147.1 | RS2 vs RM2       | <0.001 |

\* Precipitation dry season ( $S_D$ , months <100 mm), precipitation coefficient of variance ( $P_V$ ), Altitude ( $A$ , m), mean annual temperature ( $T_A$ , °C), forest moisture class ( $F_M$ , dry, moist, wet).

\*\*Based on likelihood ratio test, all others based on ANOVA

\*\*\*Random slope, random intercept model (RS, RI)

Table S4: Validation of pan-tropical, continent, regional, site-specific models. Tree height was estimated from each of the models and the median percent deviation  $((H_{\text{predicted}} - H_{\text{measured}}) / H_{\text{measured}}) * 100$  reported from the tree height measured in the field for wet to dry pan-tropical forests ( $F_M$ ), where positive values indicate the model overestimated measured height. The multi-level model structure was random slope random intercept with random = Plot. See Table S2 for model form. Models with the lowest deviation are highlighted for dry (bold, parenthesis), moist (bold and underlined) and wet (bold) forests. \*

| Model              | $F_M$ class | Africa, central | Africa, E    | Africa, W    | Amazonia, Brazilian Shield | Amazonia, E-central | Amazonia, Guyana Shield | Amazonia, W | Asia, SE     | Australia, N  | Median | St. Error |
|--------------------|-------------|-----------------|--------------|--------------|----------------------------|---------------------|-------------------------|-------------|--------------|---------------|--------|-----------|
| <b>P2</b>          | Dry         | NA              | 7.1          | -8.4         | 14.6                       | NA                  | 2.8                     | NA          | -2.3         | -0.5          | 7.4    | 0.38      |
|                    | Moist       | -19.4           | -12.3        | -10.9        | 5.8                        | -3.4                | -25.0                   | <b>2.5</b>  | -21.9        | -0.9          | -7.5   | 0.16      |
|                    | Wet         | NA              | NA           | NA           | NA                         | NA                  | NA                      | 2.1         | -36.6        | NA            | -16.6  | 1.37      |
| <b>C2</b>          | Dry         | NA              | 6.5          | 3.2          | 16.1                       | NA                  | 5.2                     | NA          | 14.0         | -0.5          | 5.9    | 0.39      |
|                    | Moist       | -29.0           | -5.9         | -9.7         | 4.7                        | 8.0                 | -30.7                   | -15.1       | -2.5         | -7.3          | -9.1   | 0.16      |
|                    | Wet         | NA              | NA           | NA           | NA                         | NA                  | NA                      | -2.1        | -17.8        | NA            | -10.7  | 1.01      |
| <b>R2</b>          | Dry         | NA              | -4.1         | 9.0          | 10.8                       | NA                  | 23.2                    | NA          | 14.1         | -0.4          | 2.7    | 0.42      |
|                    | Moist       | -22.4           | -17.2        | -4.4         | -0.8                       | -7.5                | -5.5                    | -10.0       | -2.3         | -7.3          | -6.7   | 0.15      |
|                    | Wet         | NA              | NA           | NA           | NA                         | NA                  | NA                      | <b>1.4</b>  | -17.6        | NA            | -8.4   | 1.04      |
| <b>PES2</b>        | Dry         | NA              | -2.0         | -5.3         | -2.3                       | NA                  | <b>(0.9)</b>            | NA          | <b>(0.7)</b> | 3.7           | -0.1   | 0.39      |
|                    | Moist       | -17.4           | -5.2         | 7.6          | -2.3                       | <b>1.5</b>          | -15.5                   | -16.2       | 1.5          | 7.9           | -0.4   | 0.15      |
|                    | Wet         | NA              | NA           | NA           | NA                         | NA                  | NA                      | 12.1        | -13.0        | NA            | 1.9    | 1.18      |
| <b>CES2</b>        | Dry         | NA              | <b>(0.3)</b> | 0.9          | <b>(-0.2)</b>              | NA                  | 5.0                     | NA          | 5.8          | -3.2          | -0.9   | 0.39      |
|                    | Moist       | -16.8           | <b>-0.3</b>  | 2.4          | 2.2                        | 4.3                 | -14.1                   | -12.5       | 1.3          | 1.1           | -1.8   | 0.14      |
|                    | Wet         | NA              | NA           | NA           | NA                         | NA                  | NA                      | 11.3        | -11.1        | NA            | 2.9    | 1.25      |
| <b>RES2</b>        | Dry         | NA              | -4.1         | 2.3          | 4.6                        | NA                  | 18.3                    | NA          | 9.7          | -1.8          | 0.9    | 0.40      |
|                    | Moist       | <b>-7.7</b>     | -7.3         | -2.8         | 2.1                        | -2.7                | <b>-3.9</b>             | -11.7       | <b>-0.1</b>  | <b>-0.2</b>   | -2.7   | 0.14      |
|                    | Wet         | NA              | NA           | NA           | NA                         | NA                  | NA                      | 6.5         | -11.4        | NA            | 0.1    | 1.20      |
| <b>RCS2</b>        | Dry         | NA              | -6.7         | -1.8         | -1.1                       | NA                  | 17.4                    | NA          | 3.1          | -8.3          | -3.7   | 0.40      |
|                    | Moist       | -11.6           | 0.6          | <b>-2.2</b>  | 4.3                        | -3.7                | -4.1                    | -9.4        | -0.6         | 1.7           | -2.1   | 0.13      |
|                    | Wet         | NA              | NA           | NA           | NA                         | NA                  | NA                      | 4.4         | <b>-8.7</b>  | NA            | -0.4   | 1.25      |
| <b>S2</b>          | Dry         | NA              | -1.4         | 0.1          | -2.0                       | NA                  | 0.1                     | NA          | -2.1         | -1.6          | -1.4   | 0.35      |
|                    | Moist       | -1.6            | -3.2         | -3.3         | -1.3                       | -1.2                | -1.1                    | -0.4        | -1.0         | -1.5          | -1.5   | 0.12      |
|                    | Wet         | NA              | NA           | NA           | NA                         | NA                  | NA                      | -0.8        | -0.3         | NA            | -0.6   | 0.83      |
| <b>BrownMoist2</b> | Dry         | NA              | 6.5          | <b>(0.3)</b> | 12.7                       | NA                  | -1.1                    | NA          | -2.3         | <b>(-0.3)</b> | 3.9    | 0.39      |
|                    | Moist       | -27.6           | -7.4         | -7.6         | <b>-0.1</b>                | 2.6                 | -35.4                   | -21.1       | -22.6        | -7.2          | -12.0  | 0.16      |
|                    | Wet         | NA              | NA           | NA           | NA                         | NA                  | NA                      | -4.7        | -41.3        | NA            | -21.7  | 1.42      |
| <b>BrownWet2</b>   | Dry         | NA              | 16.6         | 11.2         | 22.3                       | NA                  | 10.1                    | NA          | 8.8          | 10.7          | 14.3   | 0.35      |
|                    | Moist       | -13.5           | 4.2          | 4.3          | 11.1                       | 13.4                | -20.6                   | -7.8        | -9.4         | 4.5           | 0.3    | 0.15      |
|                    | Wet         | NA              | NA           | NA           | NA                         | NA                  | NA                      | 6.7         | -26.1        | NA            | -8.3   | 1.26      |



| <b>Model</b> | <i>F<sub>M</sub></i> class | Africa, central | Africa, E | Africa, W | Amazonia, Brazilian Shield | Amazonia, E-central | Amazonia, Guyana Shield | Amazonia, W | Asia, SE | Australia, N | <b>Median</b> | <b>St. Error</b> |
|--------------|----------------------------|-----------------|-----------|-----------|----------------------------|---------------------|-------------------------|-------------|----------|--------------|---------------|------------------|
| <b>P3</b>    | Dry                        | NA              | 16.8      | 11.8      | 22.6                       | NA                  | 10.3                    | NA          | 9.3      | 10.5         | <b>14.3</b>   | <b>0.3</b>       |
|              | Moist                      | -14.0           | 5.2       | 3.9       | 10.9                       | 13.0                | -19.5                   | -7.2        | -10.5    | 4.5          | <b>0.1</b>    | <b>0.1</b>       |
|              | Wet                        | NA              | NA        | NA        | NA                         | NA                  | NA                      | 9.0         | -25.2    | NA           | <b>-6.7</b>   | <b>1.2</b>       |
| <b>P4</b>    | Dry                        | NA              | 16.9      | 11.1      | 22.8                       | NA                  | 9.8                     | NA          | 8.9      | 10.4         | <b>14.3</b>   | <b>0.3</b>       |
|              | Moist                      | -14.1           | 5.8       | 3.9       | 11.0                       | 13.1                | -19.5                   | -7.3        | -10.6    | 4.5          | <b>0.2</b>    | <b>0.1</b>       |
|              | Wet                        | NA              | NA        | NA        | NA                         | NA                  | NA                      | 8.9         | -25.9    | NA           | <b>-6.8</b>   | <b>1.3</b>       |
| <b>P5</b>    | Dry                        | NA              | 16.8      | 11.8      | 22.6                       | NA                  | 10.1                    | NA          | 9.0      | 10.4         | <b>14.3</b>   | <b>0.3</b>       |
|              | Moist                      | -14.2           | 5.3       | 3.7       | 10.8                       | 13.0                | -19.6                   | -7.2        | -10.6    | 4.4          | <b>0.0</b>    | <b>0.1</b>       |
|              | Wet                        | NA              | NA        | NA        | NA                         | NA                  | NA                      | 9.3         | -25.4    | NA           | <b>-6.6</b>   | <b>1.2</b>       |

\* NA, not applicable, no data available.

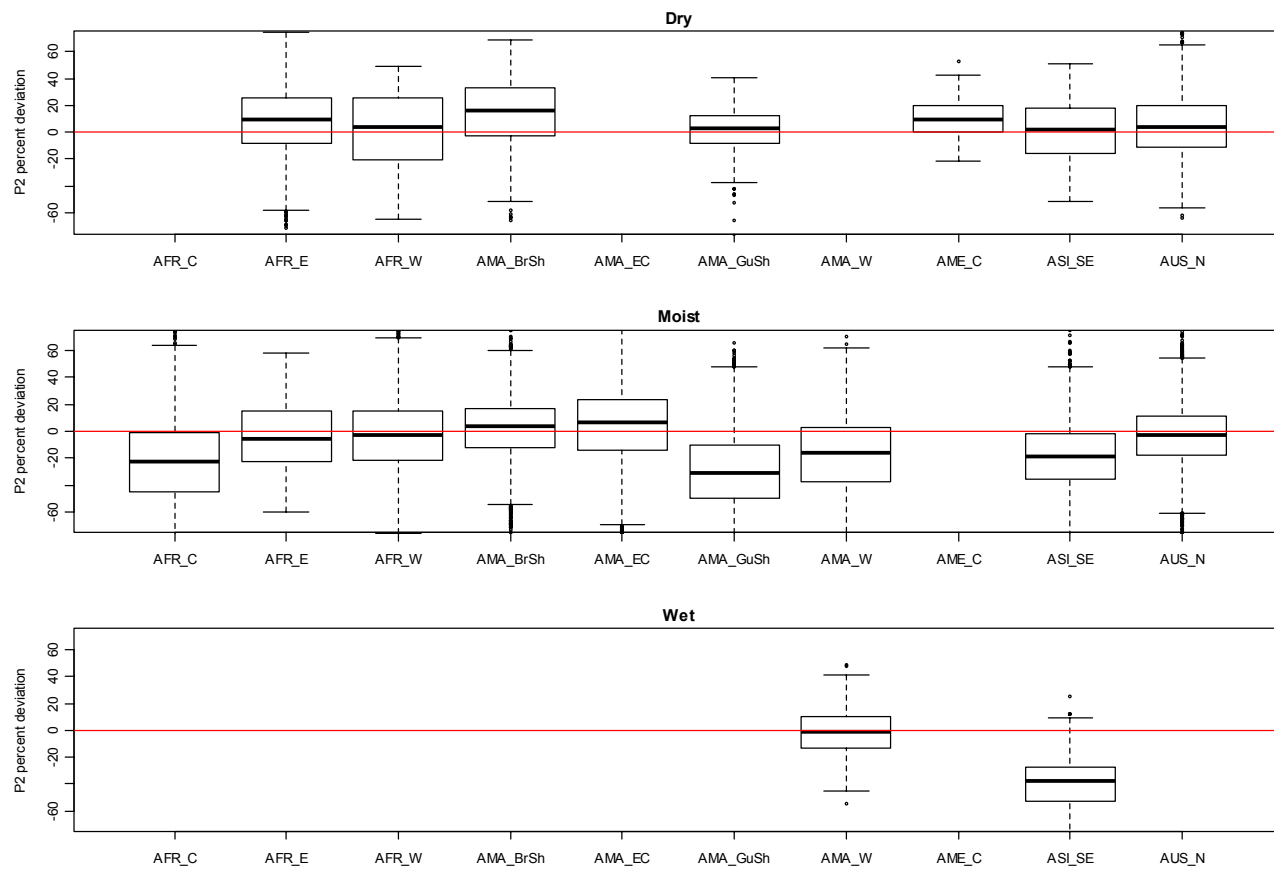

Figure S2a

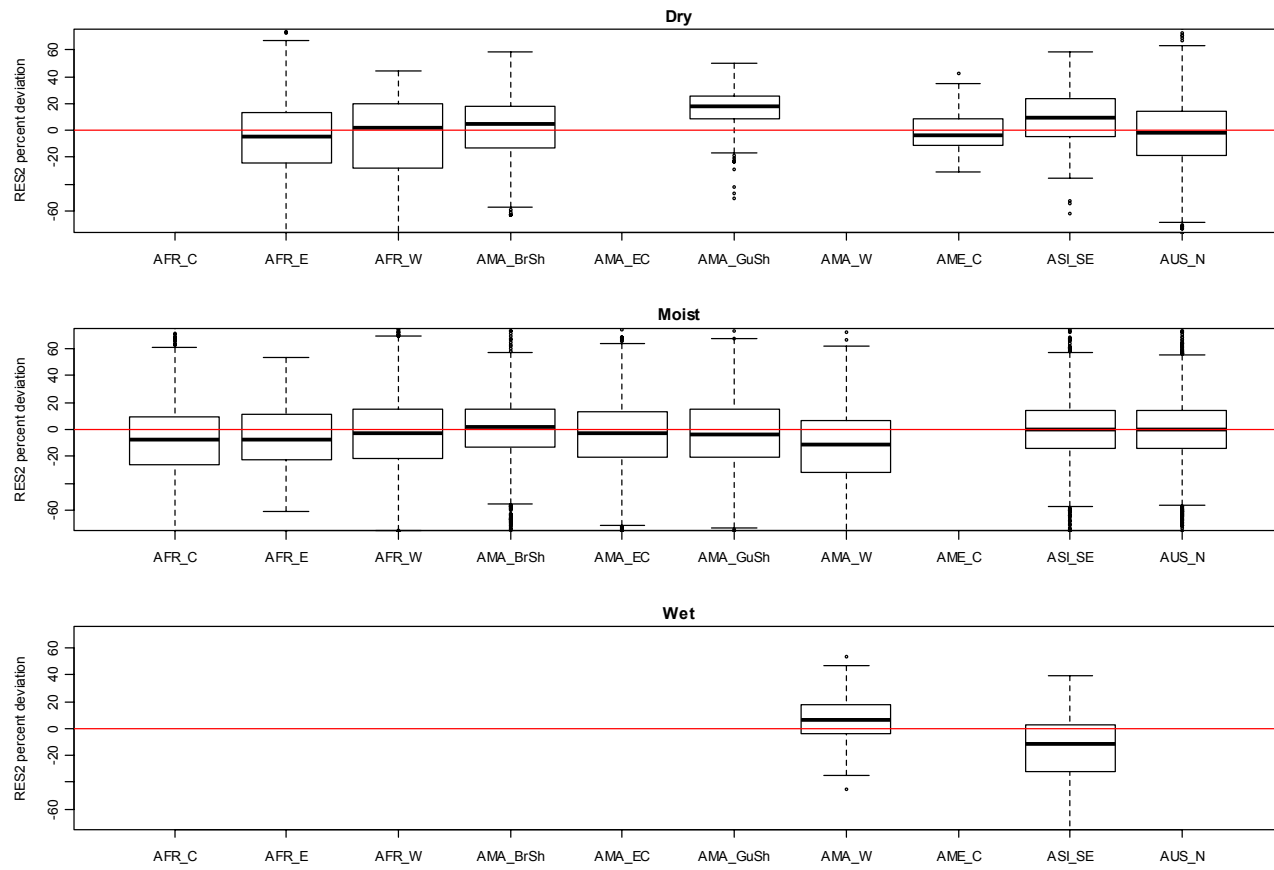

Figure S2b

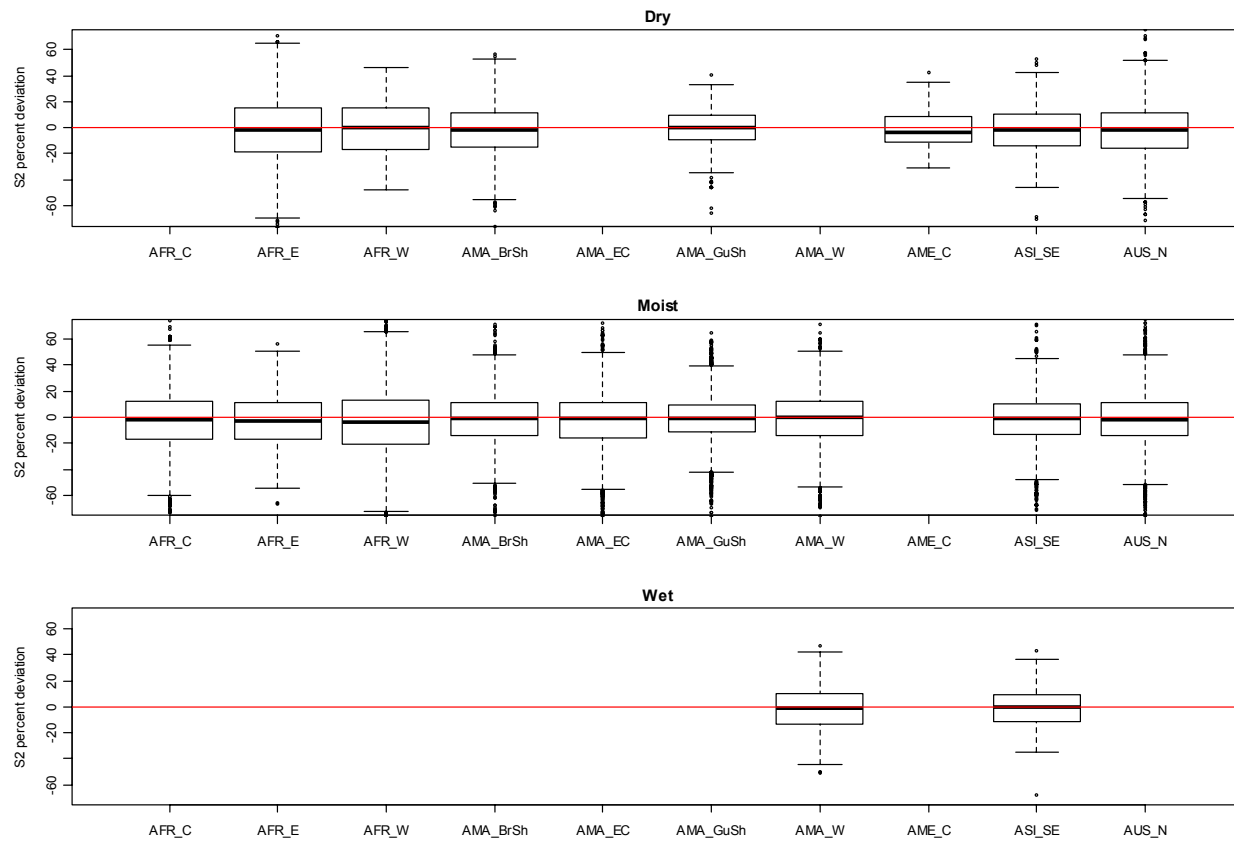

Figure S2c

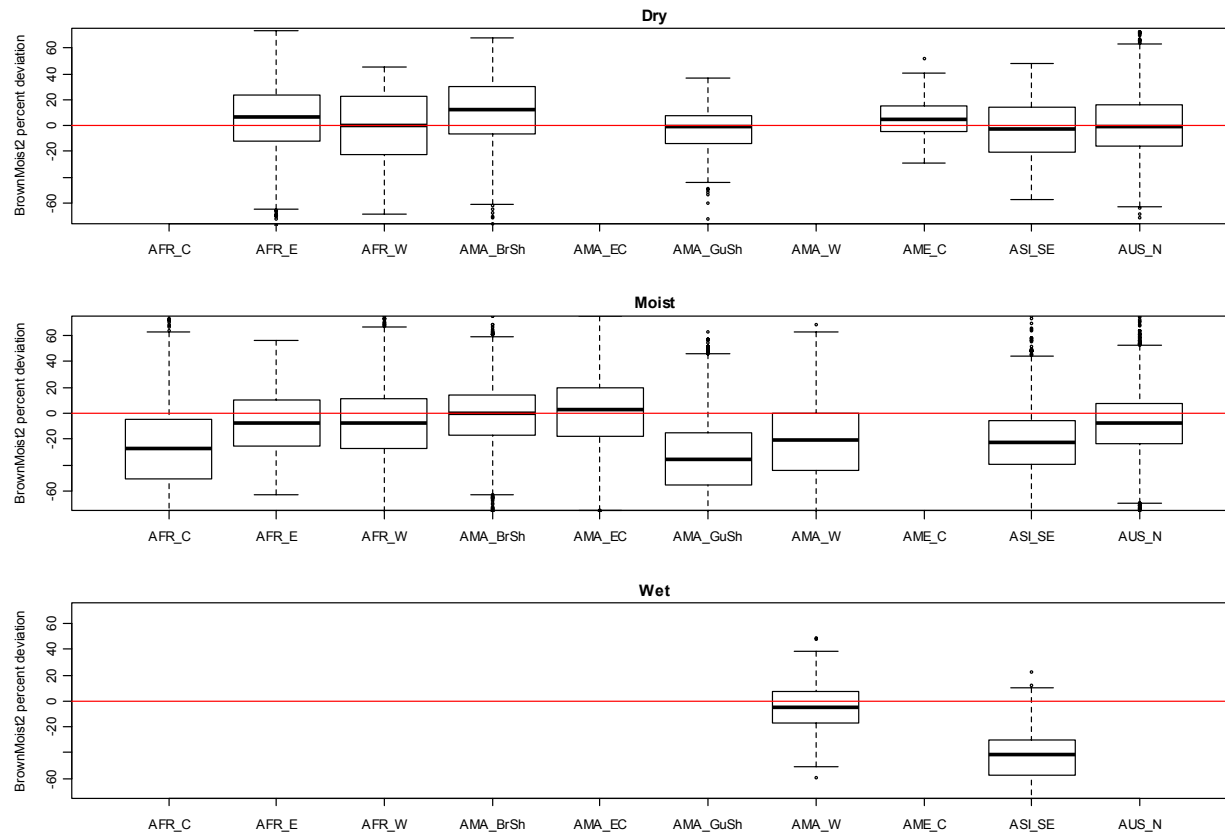

Figure S2d

Figure S2: Validation of height estimates according to multi-levels and the published Brown et al. 1989 moist forest equation for log-log a) model P, b) model RES, c) model S, d) model BrownMoist.

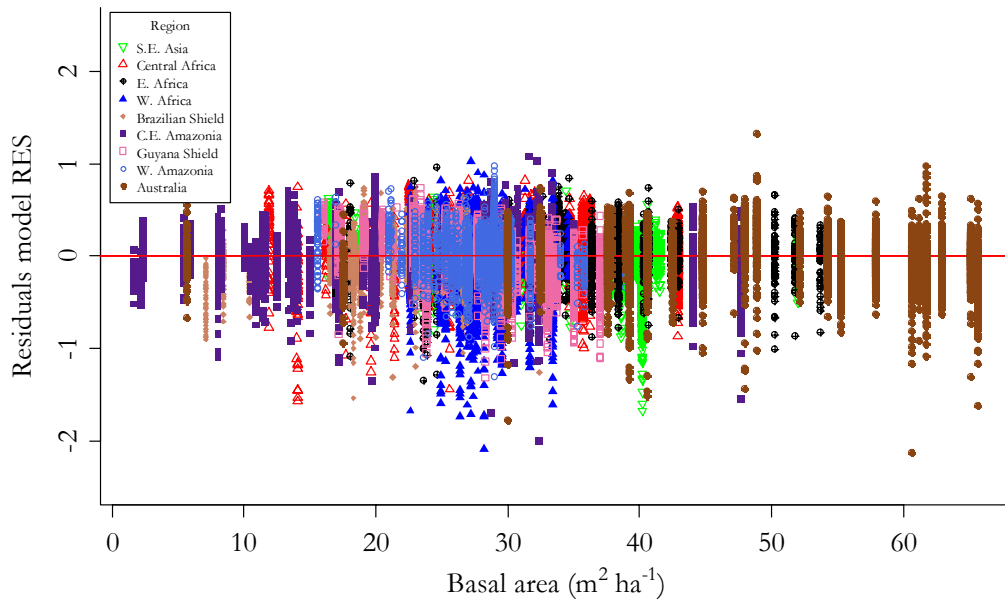

Figure S3a

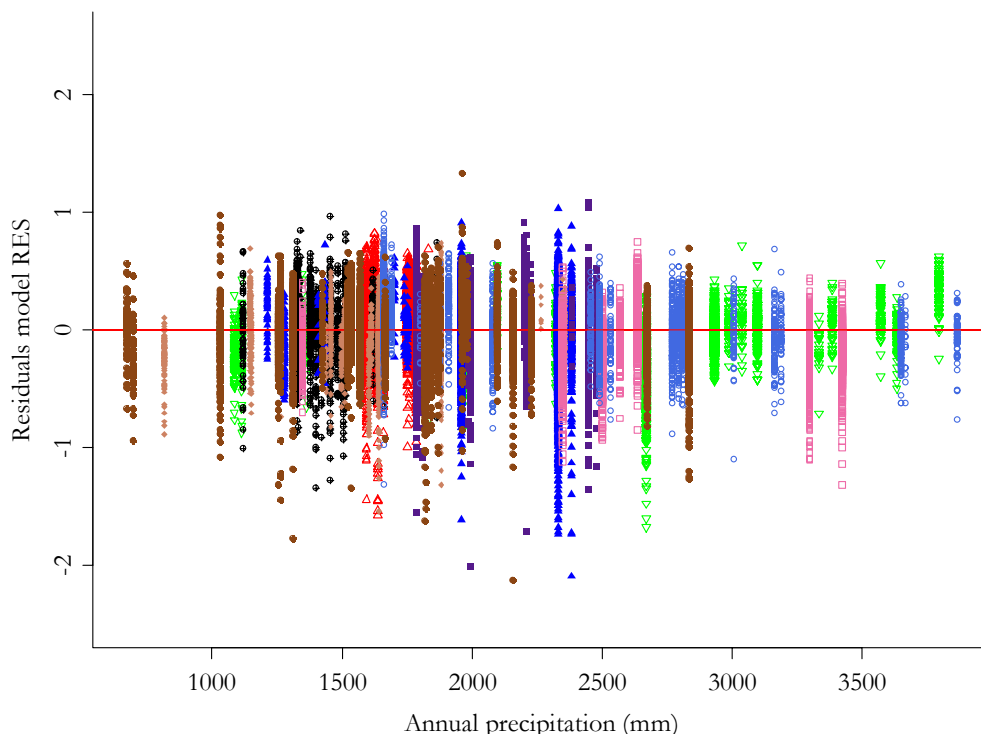

Figure S3b

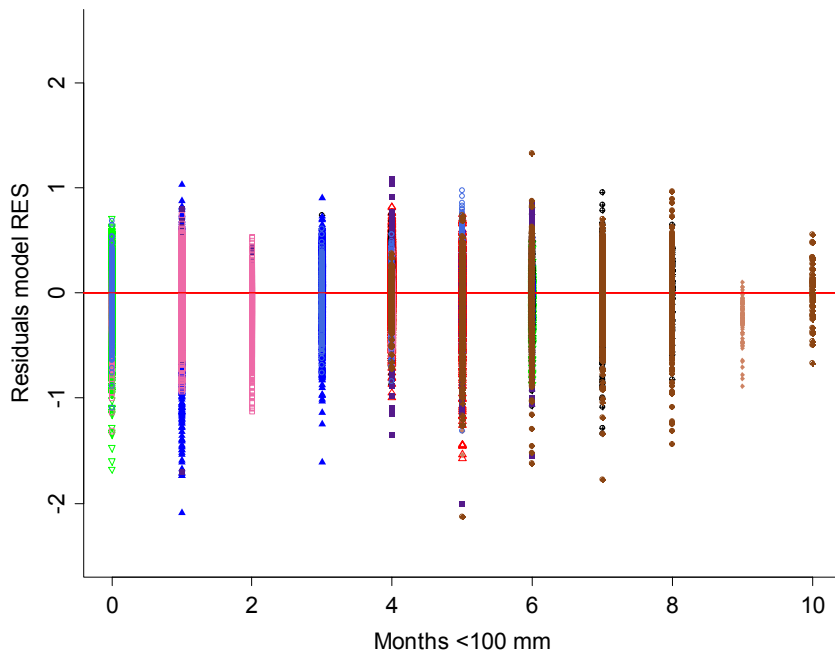

Figure S3c

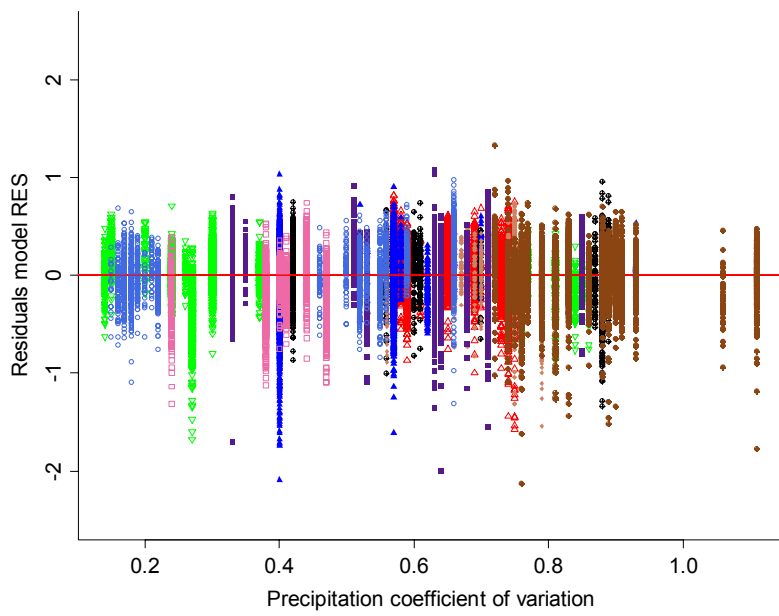

Figure S3d

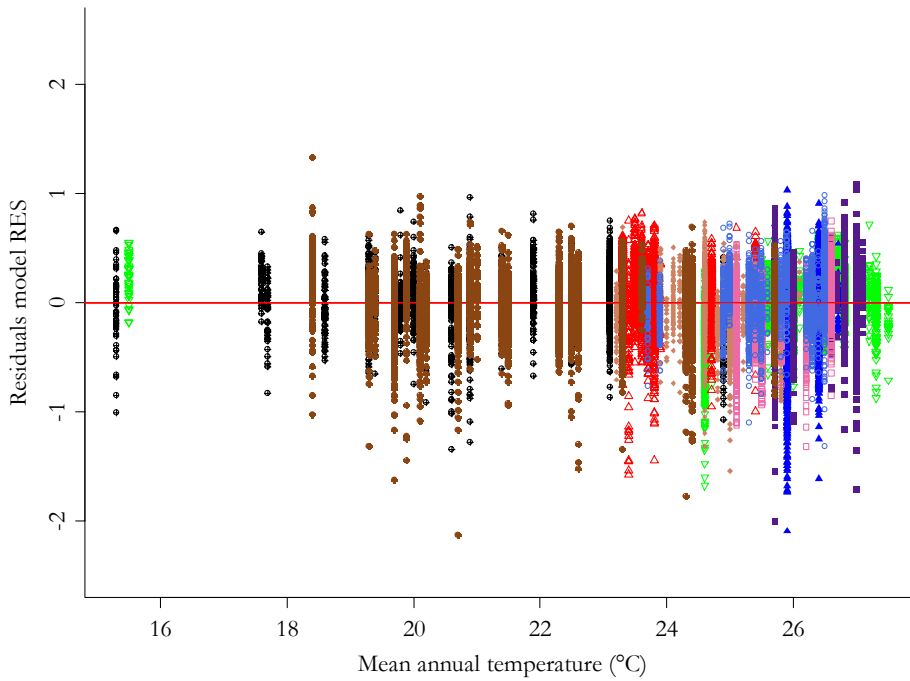

Figure S3e

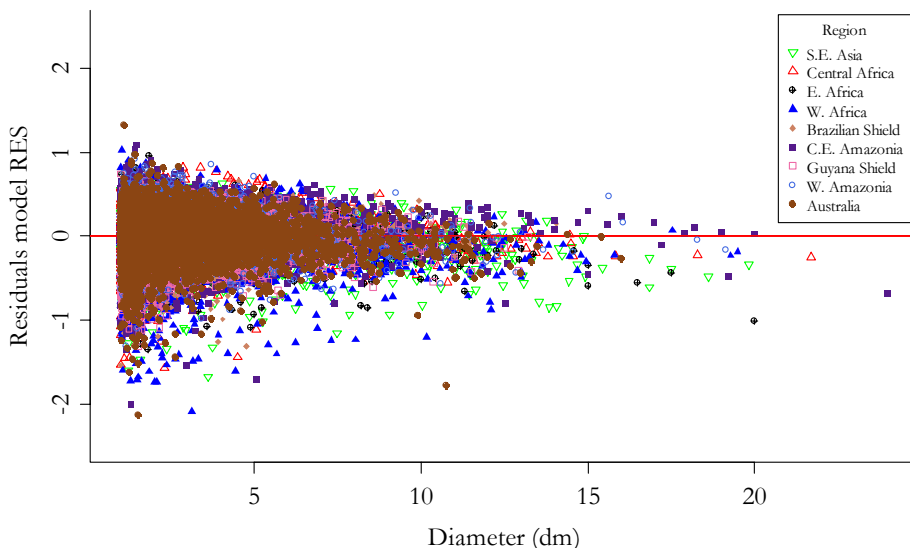

Figure S3f

Figure S3a-f: Residuals from the multilevel log-log model RES versus environment and forest structure for a) basal area ( $A$ ,  $m^2 ha^{-1}$ ), b) mean annual precipitation ( $P_A$ , mm), c) dry season ( $S_D$ , months  $< 100$  mm), d) precipitation coefficient of variance ( $P_V$ ), e) mean annual temperature ( $T_A$ ,  $^{\circ}C$ ) and f) tree diameter ( $D$ , dm).



## References

- Aiba, S., and Kitayama, K.: Structure, composition and species diversity in an altitude-substrate matrix of rain forest tree communities on Mount Kinabalu, Borneo, *Plant Ecol.*, 140, 139-157, 1999.
- Asner, G. P., Palace, M., Keller, M., Pereira, R., Silva, J. N. M., and Zweede, J. C.: Estimating canopy structure in an amazon forest from laser range finder and ikonos satellite observations, *Biotropica*, 34, 483-492, 2002.
- Baker, T. R., Phillips, O. L., Laurance, W. F., Pitman, N. C. A., Almeida, S., Arroyo, L., DiFiore, A., Erwin, T., Higuchi, N., Killeen, T. J., Laurance, S. G., Nascimento, H., Monteagudo, A., Neill, D. A., Silva, J. N. M., Malhi, Y., Gonzalez, G. L., Peacock, J., Quesada, C. A., Lewis, S. L., and Lloyd, J.: Do species traits determine patterns of wood production in amazonian forests?, *Biogeosciences*, 6, 297-307, 2009.
- Banin, L. Cross-continental comparisons of tropical forest structure and function, PhD, School of Geography, PhD Thesis. University of Leeds, Leeds, 2010.
- Berry, N. J.: Impacts of selective logging on biodiversity in Bornean rainforest, PhD, School of Geography, PhD Thesis. University of Leeds, Leeds, 2008.
- Cairns, M. A., Olmsted, I., Granados, J., and Argaez, J.: Composition and aboveground tree biomass of a dry semi-evergreen forest on Mexico's Yucatan Peninsula, *For. Ecol. Manage.*, 186, 125-132, 2003.
- Chave, J., Andalo, C., Brown, S., Cairns, M. A., Chambers, J. Q., Eamus, D., Folster, H., Fromard, F., Higuchi, N., Kira, T., Lescure, J. P., Nelson, B. W., Ogawa, H., Puig, H., Riera, B., and Yamakura, T.: Tree allometry and improved estimation of carbon stocks and balance in tropical forests, *Oecologia*, 145, 87-99, 2005.
- Drescher, M. 1998. Growth and spatial pattern in tropical tree species of a lowland Bolivian rainforest. MSc thesis, Utrecht University, Netherlands.
- Graham, A. W.: The CSIRO rainforest permanent plots of north queensland : Site, structural, floristic and edaphic descriptions, in, accessed from <http://nla.gov.au/nla.cat-vn3708155>, Rainforest CRC, James Cook University, Cairns, Australia, 227, 2006.
- Hozumi, K., Yoda, K., Kokawa, S., and Kira, T.: Production ecology of tropical rain forests in southwestern Cambodia. I. Plant biomass, *Nature and Life in Southeast Asia*, 6, 1969.
- Iida, Y., Kohyama, T. S., Kubo, T., Kassim, A. R., Poorter, L., Sterck, F., and Potts, M. D.: Architectural differentiation across a tropical rainforest community as viewed from canopy partitioning, in review.
- King, D. A., Davies, S. J., Tan, S., and Noor, N. S. M.: Trees approach gravitational limits to height in tall lowland forests of Malaysia, *Funct. Ecol.*, 23, 284-291, 10.1111/j.1365-2435.2008.01514.x, 2009.
- Lefsky, M. A., Harding, D. J., Keller, M., Cohen, W. B., Carabajal, C. C., Espirito-Santo, F. D. B., Hunter, M. O., and Jr., R. d. O.: Estimates of forest canopy height and aboveground biomass using ICESAT, *Geophys. Res. Lett.*, 32, 1-4, 2005.
- Lewis, S. L., Lopez-Gonzalez, G., Sonke, B., Affum-Baffoe, K., Baker, T. R., Ojo, L. O., Phillips, O. L., Reitsma, J. M., White, L., Comiskey, J. A., K. M.-N. D., Ewango, C. E. N., Feldpausch, T. R., Hamilton, A. C., Gloor, M., Hart, T., Hladik, A., Lloyd, J., Lovett, J. C., Makana, J.-R., Malhi, Y., Mbago, F. M., Ndangalasi, H. J., Peacock, J., Peh, K. S. H., Sheil, D., Sunderland, T., Swaine, M. D., Taplin, J., Taylor, D., Thomas, S. C., Votere, R., and Woll, H.: Increasing carbon storage in intact African tropical forests, *Nature*, 457, 1003-1006, 2009.
- Mitchard, E. T. A., Saatchi, S. S., Woodhouse, I. H., Nangendo, G., Ribeiro, N. S., Williams, M., Ryan, C. M., Lewis, S. L., Feldpausch, T. R., and Meir, P.: Using satellite radar backscatter to predict above-ground woody biomass: A consistent relationship across four different African landscapes, *Geophys. Res. Lett.*, 36, 2009.

- Müller, D., and Nielsen, J.: Production brute, pertes par respiration et production nette dans la forêt ombrophile tropicale, *Det Forstlige Forsgsvaesen i Danmark*, 29, 69-160, 1965.
- Neal, G. D.: Statistical description of the forests of thailand, Military Research and Development Center, Bangkok, 346 pp., 1967.
- Nogueira, E. M., Nelson, B. W., Fearnside, P. M., França, M. B., and Oliveira, Á. C. A. d.: Tree height in Brazil's 'arc of deforestation': Shorter trees in south and southwest Amazonia imply lower biomass, *For. Ecol. Manage.*, 255, 2963-2972, 2008.
- Ogawa, H., Yoda, K., and Kira, T.: Comparative ecological studies on three main types of forest vegetation in Thailand: II. Plant biomass, *Nature and Life in South East Asia*, 4, 49-80, 1965.
- Ogino, K., Ratanawongs, D., Tsutsumi, T., and Shidei, T.: The primary productivity of tropical forests in thailand. *Tonan Asia Kenkyu.*, *Southeast Asian Studies*, 5, 121-154, 1967.
- Palace, M., Keller, M., Asner, G. P., Hagen, S., and Braswell, B.: Amazon forest structure from IKONOS satellite data and the automated characterization of forest canopy properties, *Biotropica*, 40, 141-150, 2008.
- Peh, K. S.-H.: The relationship between species diversity and ecosystem function in low- and high-diversity tropical african forests, PhD, School of Geography, PhD Thesis. University of Leeds, Leeds, 2009.
- Poorter, L., Bongers, F., Sterck, F. J., and Woll, H.: Architecture of 53 rain forest tree species differing in adult stature and shade tolerance, *Ecology*, 84, 602-608, 2003.
- Reitsma, J. M.: Forest vegetation of gabon, Tropenbos Foundation, Ede, The Netherlands, 1988.
- Sabhasri, S., Khemnark, C., Aksornkoae, S., and Ratisoonthorn, P.: Primary production in dry-evergreen forest at sakaerat, amphoe pak thong chai, changwat nakhon ratchasima. I. Estimation of biomass and distribution amongst various organs, *ASRCT*, Bangkok, 38, 1968.
- Yamakura, T., Hagihara, A., Sukardjo, S., and Ogawa, H.: Aboveground biomass of tropical rain forest stands in indonesian Borneo, *Plant Ecol.*, 68, 71-82, 1986.
